# Supplementary material
Source: PubMed Central journal article supplement (PMC7439362)
Supplement: ao0c02205_si_001.pdf [file ao0c02205_si_001.pdf]

## Supporting Information

### **Investigation of Ni-modified MCM-41 catalyst for the reduction of oxygenates and carbon deposits during the co-pyrolysis of cellulose and polypropylene**

Yu Shi<sup>1</sup>, Chang Liu<sup>1</sup>, Jiankun Zhuo<sup>1,2,\*</sup>, Qiang Yao<sup>2,3</sup>

<sup>1</sup>Key Laboratory for Thermal Science and Power Engineering of Ministry of Education, Department of energy and power Engineering, Tsinghua University, Beijing 100084, China

<sup>2</sup>Beijing Engineering Research Center for Ecological Restoration and Carbon Fixation of Saline–alkaline and Desert Land, Tsinghua University, Beijing 100084, China

<sup>3</sup>School of Electric Engineering , Xinjiang University, Urumqi 830047, China

## Figures:

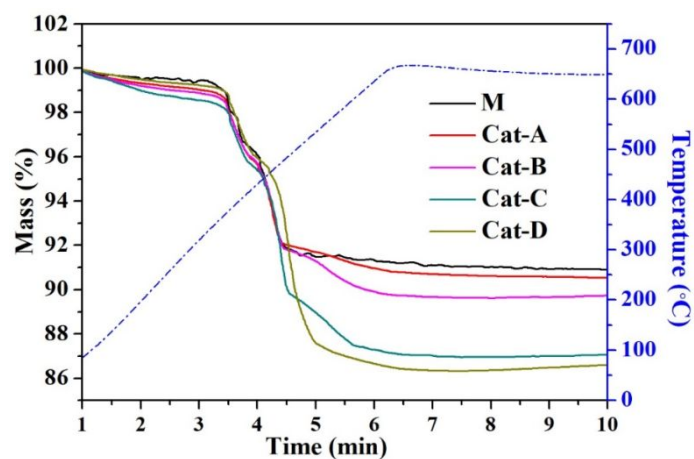

**Figure S1.** TGA profiles for five catalysts (Under  $N_2$  atmosphere, the temperature was raised to  $650\text{ }^\circ\text{C}$  at a temperature ramp rate of  $100\text{ }^\circ\text{C}\cdot\text{min}^{-1}$ , and maintained for 5 mins)

All fresh catalysts were used to pyrolyze cellulose and PP at  $650\text{ }^\circ\text{C}$  for 5 minutes in an  $N_2$  atmosphere with a catalyst to reactant mass ratio of 10 to 1, the TGA curves are all shown in Fig. S1. At the end of the reaction, the quality of each sample all reached stable level.

## Tables:

**Table S1**

Main identified products from catalytic co-pyrolysis of cellulose and PP with catalyst M

| RT (min) | Peak Name                           | Chem. Formula                                | Relative Area (%) |
|----------|-------------------------------------|----------------------------------------------|-------------------|
| 2.17     | 2-Butene, 2-methyl-                 | C <sub>5</sub> H <sub>10</sub>               | 10.41             |
| 2.50     | 2-Pentene, 3-methyl-, (Z)-          | C <sub>6</sub> H <sub>12</sub>               | 6.04              |
| 2.78     | 2-Pentene, 2,4-dimethyl-            | C <sub>7</sub> H <sub>14</sub>               | 2.14              |
| 2.86     | Cyclopentanone, 2-methyl-           | C <sub>6</sub> H <sub>10</sub> O             | 0.53              |
| 3.13     | Cyclopentane, 1,3-dimethyl-, cis-   | C <sub>7</sub> H <sub>14</sub>               | 0.53              |
| 3.28     | (R)-(+)-3-Methylcyclopentanone      | C <sub>7</sub> H <sub>14</sub>               | 5.57              |
| 3.90     | 2,4-Pentadien-1-ol, 3-ethyl-, (2Z)- | C <sub>7</sub> H <sub>12</sub> O             | 0.79              |
| 4.13     | 3-Octene, (Z)-                      | C <sub>8</sub> H <sub>16</sub>               | 0.89              |
| 4.38     | Toluene                             | C <sub>7</sub> H <sub>8</sub>                | 2.86              |
| 4.79     | 1,4-Cyclohexanedione                | C <sub>6</sub> H <sub>8</sub> O <sub>2</sub> | 0.24              |
| 5.06     | Hexane, 3-methyl-4-methylene-       | C <sub>8</sub> H <sub>16</sub>               | 3.15              |
| 5.38     | 1-Octanol                           | C <sub>8</sub> H <sub>18</sub> O             | 1.56              |
| 5.87     | 2,2-Dimethyl-3-heptene trans        | C <sub>9</sub> H <sub>18</sub>               | 0.33              |
| 6.06     | Furfural                            | C <sub>5</sub> H <sub>4</sub> O <sub>2</sub> | 12.53             |
| 6.33     | 2,4-Dimethyl-1-heptene              | C <sub>9</sub> H <sub>18</sub>               | 1.02              |
| 6.43     | 2,3-Dimethyl-3-heptene              | C <sub>9</sub> H <sub>18</sub>               | 0.89              |
| 6.65     | 4-Nonene                            | C <sub>9</sub> H <sub>18</sub>               | 1.17              |
| 6.83     | trans--4-Nonene                     | C <sub>9</sub> H <sub>18</sub>               | 0.32              |
| 6.99     | Ethylbenzene                        | C <sub>8</sub> H <sub>10</sub>               | 0.53              |
| 7.14     | Cyclohexanone, 3,5-dimethyl-        | C <sub>8</sub> H <sub>14</sub> O             | 0.41              |
| 7.36     | o-Xylene                            | C <sub>8</sub> H <sub>10</sub>               | 3.44              |
| 7.71     | Cyclohexane, (2-methylpropyl)-      | C <sub>10</sub> H <sub>20</sub>              | 3.05              |
| 8.15     | Ethylbenzene                        | C <sub>8</sub> H <sub>10</sub>               | 1.20              |
| 9.44     | 4-Isopropylcyclohexanone            | C <sub>9</sub> H <sub>16</sub> O             | 0.66              |
| 10.52    | 4-Isopropylcyclohexanone            | C <sub>9</sub> H <sub>16</sub> O             | 0.68              |
| 10.79    | 1-Decanol                           | C <sub>10</sub> H <sub>22</sub> O            | 0.66              |
| 11.00    | Benzene, 1-ethyl-3-methyl-          | C <sub>9</sub> H <sub>12</sub>               | 2.98              |
| 11.39    | Benzene, 1,3,5-trimethyl-           | C <sub>9</sub> H <sub>12</sub>               | 1.00              |
| 11.77    | Benzene, 1-ethyl-3-methyl-          | C <sub>9</sub> H <sub>12</sub>               | 0.32              |
| 11.93    | Phenol                              | C <sub>6</sub> H <sub>6</sub> O              | 0.40              |
| 12.11    | 4-Undecene, (Z)-                    | C <sub>11</sub> H <sub>22</sub>              | 0.59              |
| 12.51    | Benzene, 1-ethyl-3-methyl-          | C <sub>9</sub> H <sub>12</sub>               | 3.55              |
| 12.75    | 4-Isopropylcyclohexanone            | C <sub>9</sub> H <sub>16</sub> O             | 0.73              |

|       |                                  |                                              |      |
|-------|----------------------------------|----------------------------------------------|------|
| 13.74 | Benzene, 1,2,4-trimethyl-        | C <sub>9</sub> H <sub>12</sub>               | 0.95 |
| 14.36 | Indane                           | C <sub>9</sub> H <sub>10</sub>               | 0.76 |
| 14.78 | Indene                           | C <sub>9</sub> H <sub>8</sub>                | 0.62 |
| 15.02 | 1-Dodecene                       | C <sub>12</sub> H <sub>24</sub>              | 0.42 |
| 15.17 | 5-Undecene, (Z)-                 | C <sub>11</sub> H <sub>22</sub>              | 0.50 |
| 15.73 | 2-Pentene, 3,4-dimethyl-, (Z)-   | C <sub>7</sub> H <sub>14</sub>               | 0.64 |
| 16.36 | Benzene, 4-ethyl-1,2-dimethyl-   | C <sub>10</sub> H <sub>14</sub>              | 0.20 |
| 17.13 | 1,2-Benzenediol, 3-methyl-       | C <sub>7</sub> H <sub>8</sub> O <sub>2</sub> | 0.20 |
| 17.32 | 2H-Inden-2-one, 1,3-dihydro-     | C <sub>9</sub> H <sub>8</sub> O              | 0.40 |
| 18.28 | Benzene, 1,2,4,5-tetramethyl-    | C <sub>10</sub> H <sub>14</sub>              | 0.58 |
| 18.44 | Benzene, 1,2,4,5-tetramethyl-    | C <sub>10</sub> H <sub>14</sub>              | 0.71 |
| 19.88 | Benzene, 1,2,4,5-tetramethyl-    | C <sub>10</sub> H <sub>14</sub>              | 0.60 |
| 21.44 | Naphthalene                      | C <sub>10</sub> H <sub>8</sub>               | 0.27 |
| 22.91 | Phenol, 2-methyl-6-(2-propenyl)- | C <sub>10</sub> H <sub>12</sub> O            | 0.17 |
| 25.80 | Phenol, 2-methyl-6-(2-propenyl)- | C <sub>12</sub> H <sub>12</sub> O            | 0.99 |
| 26.49 | Naphthalene, 2-methyl-           | C <sub>11</sub> H <sub>10</sub>              | 0.53 |
| 26.93 | 1-Tetradecene                    | C <sub>14</sub> H <sub>28</sub>              | 0.50 |
| 31.79 | Naphthalene, 1,8-dimethyl-       | C <sub>12</sub> H <sub>12</sub>              | 0.38 |
| 35.96 | 1-Octadecanol                    | C <sub>18</sub> H <sub>38</sub> O            | 0.46 |
| 36.33 | Naphthalene, 1,6,7-trimethyl-    | C <sub>13</sub> H <sub>14</sub>              | 0.42 |
| 36.88 | Naphthalene, 1,6,7-trimethyl-    | C <sub>13</sub> H <sub>14</sub>              | 0.36 |
| 37.62 | 1-Nonadecene                     | C <sub>19</sub> H <sub>38</sub>              | 0.49 |
| 38.30 | Fluorene                         | C <sub>13</sub> H <sub>10</sub>              | 0.32 |
| 42.72 | 1-Nonadecene                     | C <sub>19</sub> H <sub>38</sub>              | 0.49 |

**Table S2**

Main identified products from catalytic co-pyrolysis of cellulose and PP with Cat-A

| RT (min) | Peak Name                          | Chem. Formula                                | Relative Area (%) |
|----------|------------------------------------|----------------------------------------------|-------------------|
| 1.99     | 2-Butene                           | C <sub>4</sub> H <sub>8</sub>                | 1.70              |
| 2.13     | 2-Pentene, (E)-                    | C <sub>5</sub> H <sub>10</sub>               | 11.62             |
| 2.45     | 2-Pentene, 3-methyl-               | C <sub>6</sub> H <sub>12</sub>               | 11.17             |
| 2.73     | 2,4-Hexadien-1-ol                  | C <sub>6</sub> H <sub>10</sub> O             | 5.54              |
| 2.87     | Benzene                            | C <sub>6</sub> H <sub>6</sub>                | 4.25              |
| 3.08     | Cyclopentane, 1,3-dimethyl-        | C <sub>7</sub> H <sub>14</sub>               | 1.34              |
| 3.25     | 3-Furanmethanol                    | C <sub>5</sub> H <sub>6</sub> O <sub>2</sub> | 3.87              |
| 4.09     | Bicyclo[3.3.1]non-3-en-2-ol, exo-  | C <sub>9</sub> H <sub>14</sub> O             | 2.12              |
| 4.20     | 3-Octene, (Z)-                     | C <sub>8</sub> H <sub>16</sub>               | 0.46              |
| 4.35     | Cyclobutene, 2-propenylidene-      | C <sub>7</sub> H <sub>8</sub>                | 4.86              |
| 4.58     | (5-Methylcyclopent-1-enyl)methanol | C <sub>7</sub> H <sub>12</sub> O             | 0.22              |
| 4.72     | 3-Octene, (Z)-                     | C <sub>8</sub> H <sub>16</sub>               | 0.26              |
| 4.87     | 4-Octene, (E)-                     | C <sub>8</sub> H <sub>16</sub>               | 0.63              |

|       |                                             |                                              |      |
|-------|---------------------------------------------|----------------------------------------------|------|
| 5.06  | Cyclopentanone, 2-(1-methylpropyl)-         | C <sub>9</sub> H <sub>16</sub> O             | 2.89 |
| 5.33  | 3-Octene, (Z)-                              | C <sub>8</sub> H <sub>16</sub>               | 0.59 |
| 5.47  | Furfural                                    | C <sub>5</sub> H <sub>4</sub> O <sub>2</sub> | 0.22 |
| 6.02  | Furfural                                    | C <sub>5</sub> H <sub>4</sub> O <sub>2</sub> | 7.89 |
| 6.26  | 2,4-Dimethyl-1-heptene                      | C <sub>9</sub> H <sub>18</sub>               | 1.11 |
| 6.37  | trans--4-Nonene                             | C <sub>9</sub> H <sub>18</sub>               | 1.39 |
| 6.60  | trans--4-Nonene                             | C <sub>9</sub> H <sub>18</sub>               | 1.05 |
| 6.77  | Cyclohexane, propyl-                        | C <sub>9</sub> H <sub>18</sub>               | 0.46 |
| 6.96  | Ethylbenzene                                | C <sub>8</sub> H <sub>10</sub>               | 1.10 |
| 7.09  | cis,cis-4,6-Octadienol                      | C <sub>8</sub> H <sub>14</sub> O             | 0.75 |
| 7.30  | Benzene, 1,3-dimethyl-                      | C <sub>8</sub> H <sub>10</sub>               | 3.46 |
| 7.66  | 3-Octene, 2,2-dimethyl-                     | C <sub>10</sub> H <sub>20</sub>              | 1.31 |
| 7.88  | 4,4-Dimethyl-cyclohex-2-en-1-ol             | C <sub>8</sub> H <sub>14</sub> O             | 0.36 |
| 8.10  | o-Xylene                                    | C <sub>8</sub> H <sub>10</sub>               | 1.68 |
| 8.27  | 2,3-Dimethyl-3-heptene                      | C <sub>9</sub> H <sub>18</sub>               | 0.24 |
| 8.38  | 3-Heptene, 2,6-dimethyl-                    | C <sub>9</sub> H <sub>18</sub>               | 0.17 |
| 8.53  | Furan, 2,5-dimethyl-                        | C <sub>6</sub> H <sub>8</sub> O              | 0.20 |
| 8.75  | 5-Octen-2-yn-4-ol                           | C <sub>8</sub> H <sub>12</sub> O             | 0.19 |
| 9.38  | 2-Butenal, 2-ethyl-                         | C <sub>6</sub> H <sub>10</sub> O             | 0.49 |
| 9.93  | Cyclopentanone, 2-methyl-3-(1-methylethyl)- | C <sub>9</sub> H <sub>16</sub> O             | 0.30 |
| 10.48 | Cyclopentanone, 2-methyl-3-(1-methylethyl)- | C <sub>9</sub> H <sub>16</sub> O             | 0.21 |
| 10.73 | 3-Decyn-2-ol                                | C <sub>10</sub> H <sub>18</sub> O            | 0.26 |
| 10.97 | 2,5,8- Trimethyl-1-nonen-3-yn-5-ol          | C <sub>12</sub> H <sub>20</sub> O            | 2.50 |
| 11.10 | Benzene, 1-ethyl-3-methyl-                  | C <sub>9</sub> H <sub>12</sub>               | 0.36 |
| 11.34 | Benzene, 1-ethyl-3-methyl-                  | C <sub>9</sub> H <sub>12</sub>               | 0.64 |
| 11.72 | Benzene, 1-ethyl-3-methyl-                  | C <sub>9</sub> H <sub>12</sub>               | 0.27 |
| 11.89 | Phenol                                      | C <sub>6</sub> H <sub>6</sub> O              | 0.46 |
| 12.45 | Benzene, 1-ethyl-3-methyl-                  | C <sub>9</sub> H <sub>12</sub>               | 2.28 |
| 12.70 | 7-Octenal, 3,7-dimethyl-                    | C <sub>10</sub> H <sub>18</sub> O            | 0.28 |
| 13.12 | 2,4-Pentadien-1-ol, 3-pentyl-, (2Z)-        | C <sub>10</sub> H <sub>18</sub> O            | 0.20 |
| 13.68 | Benzene, 1,2,4-trimethyl-                   | C <sub>9</sub> H <sub>12</sub>               | 0.71 |
| 13.92 | trans-p-mentha-1(7),8-dien-2-ol             | C <sub>10</sub> H <sub>16</sub> O            | 0.17 |
| 14.73 | Indene                                      | C <sub>9</sub> H <sub>8</sub>                | 0.51 |
| 14.96 | Benzene, 1,4-diethyl-                       | C <sub>10</sub> H <sub>14</sub>              | 0.34 |
| 15.12 | Benzene, 1-ethyl-3-methyl-                  | C <sub>9</sub> H <sub>12</sub>               | 0.41 |
| 15.28 | Phenol, 3-methyl-                           | C <sub>7</sub> H <sub>8</sub> O              | 0.35 |
| 15.36 | Benzyl Alcohol                              | C <sub>7</sub> H <sub>8</sub> O              | 0.26 |
| 15.44 | Benzene, 1-ethyl-2,4-dimethyl-              | C <sub>10</sub> H <sub>14</sub>              | 0.56 |
| 15.66 | Cyclohexane, pentyl-                        | C <sub>11</sub> H <sub>22</sub>              | 0.27 |
| 15.79 | Benzene, 1-ethyl-3-methyl-                  | C <sub>9</sub> H <sub>12</sub>               | 0.19 |
| 16.31 | Benzene, 2-ethyl-1,4-dimethyl-              | C <sub>10</sub> H <sub>14</sub>              | 0.28 |
| 16.42 | Benzene, 2-ethyl-1,4-dimethyl-              | C <sub>10</sub> H <sub>14</sub>              | 0.41 |
| 16.62 | 1-Dodecene                                  | C <sub>12</sub> H <sub>24</sub>              | 0.32 |
| 16.72 | Benzene, 1-methyl-4-(1-methylethyl)-        | C <sub>10</sub> H <sub>14</sub>              | 0.50 |

|       |                                         |                                                |      |
|-------|-----------------------------------------|------------------------------------------------|------|
| 17.59 | Benzene, 1-methyl-4-(1-methylethyl)-    | C <sub>10</sub> H <sub>14</sub>                | 0.53 |
| 19.81 | p-Cymene                                | C <sub>10</sub> H <sub>14</sub>                | 0.55 |
| 20.03 | Naphthalene                             | C <sub>10</sub> H <sub>8</sub>                 | 0.54 |
| 21.37 | Naphthalene                             | C <sub>10</sub> H <sub>8</sub>                 | 0.62 |
| 21.95 | Phenol, 2-methyl-6-(2-propenyl)-        | C <sub>10</sub> H <sub>12</sub> O <sub>2</sub> | 0.30 |
| 24.82 | Naphthalene, 1,2-dihydro-3-methyl-      | C <sub>11</sub> H <sub>12</sub>                | 0.18 |
| 25.11 | Naphthalene, 1,2-dihydro-3-methyl-      | C <sub>11</sub> H <sub>12</sub>                | 0.20 |
| 26.43 | Naphthalene, 1-methyl-                  | C <sub>11</sub> H <sub>10</sub>                | 0.52 |
| 27.08 | Bicyclo[4.4.1]undeca-1,3,5,7,9-pentaene | C <sub>11</sub> H <sub>10</sub>                | 0.35 |
| 29.83 | (1-Methylpenta-1,3-dienyl)benzene       | C <sub>12</sub> H <sub>14</sub>                | 0.23 |
| 31.72 | Naphthalene, 1,8-dimethyl-              | C <sub>12</sub> H <sub>12</sub>                | 0.37 |
| 36.26 | 3-(2-Methyl-propenyl)-1H-indene         | C <sub>13</sub> H <sub>14</sub>                | 0.18 |
| 36.79 | 3-(2-Methyl-propenyl)-1H-indene         | C <sub>13</sub> H <sub>14</sub>                | 0.19 |
| 37.52 | 3-(2-Methyl-propenyl)-1H-indene         | C <sub>13</sub> H <sub>14</sub>                | 0.35 |
| 38.21 | Fluorene                                | C <sub>13</sub> H <sub>10</sub>                | 0.32 |
| 42.66 | 1-Nonadecene                            | C <sub>19</sub> H <sub>38</sub>                | 0.52 |

**Table S3**

Main identified products from catalytic co-pyrolysis of cellulose and PP with Cat-B

| RT (min) | Peak Name                            | Chem. Formula                                | Relative Area (%) |
|----------|--------------------------------------|----------------------------------------------|-------------------|
| 2.13     | 2-Pentene, (E)-                      | C <sub>5</sub> H <sub>10</sub>               | 12.67             |
| 2.45     | 2-Pentene, 3-methyl-                 | C <sub>6</sub> H <sub>12</sub>               | 9.39              |
| 2.73     | 2-Pentene, 3,4-dimethyl-, (Z)-       | C <sub>7</sub> H <sub>14</sub>               | 3.00              |
| 2.86     | Benzene                              | C <sub>6</sub> H <sub>6</sub>                | 4.37              |
| 3.26     | 3-Furanmethanol                      | C <sub>5</sub> H <sub>6</sub> O <sub>2</sub> | 3.90              |
| 4.04     | 2,4-Pentadien-1-ol, 3-ethyl-, (2Z)-  | C <sub>8</sub> H <sub>16</sub>               | 0.96              |
| 4.07     | 3-Octene, (Z)-                       | C <sub>8</sub> H <sub>16</sub>               | 0.74              |
| 4.32     | Toluene                              | C <sub>7</sub> H <sub>8</sub>                | 5.21              |
| 4.84     | 4-Octene, (E)-                       | C <sub>8</sub> H <sub>16</sub>               | 0.68              |
| 4.99     | cis-4-Decenal                        | C <sub>10</sub> H <sub>18</sub> O            | 2.06              |
| 5.31     | 3-Octene, (Z)-                       | C <sub>8</sub> H <sub>16</sub>               | 0.62              |
| 5.43     | 3-Decen-1-ol, (Z)-                   | C <sub>10</sub> H <sub>20</sub> O            | 0.26              |
| 5.95     | Furfural                             | C <sub>5</sub> H <sub>4</sub> O <sub>2</sub> | 7.34              |
| 6.34     | Cyclohexanone, 3,5-dimethyl-         | C <sub>8</sub> H <sub>14</sub> O             | 1.09              |
| 6.73     | 2,4-Pentadien-1-ol, 3-propyl-, (2Z)- | C <sub>8</sub> H <sub>14</sub> O             | 0.18              |
| 6.92     | Ethylbenzene                         | C <sub>8</sub> H <sub>10</sub>               | 0.65              |
| 7.07     | Cyclohexanone, 3,5-dimethyl-         | C <sub>8</sub> H <sub>14</sub> O             | 0.43              |
| 7.24     | Benzene, 1,3-dimethyl-               | C <sub>8</sub> H <sub>10</sub>               | 4.26              |
| 7.62     | 3-Octene, 2,2-dimethyl-              | C <sub>10</sub> H <sub>20</sub>              | 1.55              |
| 8.06     | o-Xylene                             | C <sub>8</sub> H <sub>10</sub>               | 1.93              |

|       |                                                |                                              |      |
|-------|------------------------------------------------|----------------------------------------------|------|
| 8.23  | 2,2-Dimethyl-3-heptene trans                   | C <sub>9</sub> H <sub>18</sub>               | 0.26 |
| 8.47  | Furfural                                       | C <sub>5</sub> H <sub>4</sub> O <sub>2</sub> | 0.28 |
| 9.36  | 2-Pentene, 4,4-dimethyl-, (Z)-                 | C <sub>7</sub> H <sub>14</sub>               | 0.36 |
| 9.89  | 3-Decyn-2-ol                                   | C <sub>10</sub> H <sub>18</sub> O            | 0.38 |
| 10.92 | Benzene, 1-ethyl-3-methyl-                     | C <sub>9</sub> H <sub>12</sub>               | 2.09 |
| 11.06 | Benzene, 1-ethyl-3-methyl-                     | C <sub>9</sub> H <sub>12</sub>               | 0.39 |
| 11.30 | Benzene, 1-ethyl-3-methyl-                     | C <sub>9</sub> H <sub>12</sub>               | 0.82 |
| 11.68 | Benzene, 1-ethyl-2-methyl-                     | C <sub>9</sub> H <sub>12</sub>               | 0.37 |
| 11.83 | Phenol                                         | C <sub>6</sub> H <sub>6</sub> O              | 0.53 |
| 12.42 | Benzene, 1-ethyl-3-methyl-                     | C <sub>9</sub> H <sub>12</sub>               | 3.10 |
| 13.65 | Mesitylene                                     | C <sub>9</sub> H <sub>12</sub>               | 1.00 |
| 14.26 | Benzene, 1-propenyl-                           | C <sub>9</sub> H <sub>10</sub>               | 0.70 |
| 14.70 | Indene                                         | C <sub>9</sub> H <sub>8</sub>                | 0.54 |
| 15.24 | Phenol, 3-methyl-                              | C <sub>7</sub> H <sub>8</sub> O              | 0.36 |
| 15.42 | Benzene, 1-ethyl-2,4-dimethyl-                 | C <sub>10</sub> H <sub>14</sub>              | 0.64 |
| 16.40 | p-Cymene                                       | C <sub>10</sub> H <sub>14</sub>              | 0.42 |
| 16.49 | Benzene, cyclopropyl-                          | C <sub>9</sub> H <sub>10</sub>               | 0.19 |
| 16.69 | p-Cymene                                       | C <sub>10</sub> H <sub>14</sub>              | 0.86 |
| 18.19 | Benzene, 1-ethyl-3,5-dimethyl-                 | C <sub>10</sub> H <sub>14</sub>              | 0.39 |
| 18.36 | p-Cymene                                       | C <sub>10</sub> H <sub>14</sub>              | 0.54 |
| 19.25 | Indane                                         | C <sub>9</sub> H <sub>10</sub>               | 0.24 |
| 19.66 | Benzene, cyclopropyl-                          | C <sub>9</sub> H <sub>10</sub>               | 0.57 |
| 19.79 | Benzene, 1,2,3,5-tetramethyl-                  | C <sub>10</sub> H <sub>14</sub>              | 0.78 |
| 20.01 | 1H-Indene, 3-methyl-                           | C <sub>10</sub> H <sub>10</sub>              | 0.79 |
| 21.36 | Naphthalene                                    | C <sub>10</sub> H <sub>8</sub>               | 1.35 |
| 21.55 | 1(2H)-Naphthalenone, 3,4-dihydro-5,7-dimethyl- | C <sub>12</sub> H <sub>14</sub> O            | 0.38 |
| 21.71 | Benzene, 1,3-bis(1-methylethyl)-               | C <sub>12</sub> H <sub>18</sub>              | 0.27 |
| 24.82 | 2-Cyclohexen-1-one, 3-phenyl-                  | C <sub>12</sub> H <sub>12</sub> O            | 0.31 |
| 25.10 | Naphthalene, 1,2-dihydro-3-methyl-             | C <sub>11</sub> H <sub>12</sub>              | 0.25 |
| 24.82 | 2-Cyclohexen-1-one, 3-phenyl-                  | C <sub>12</sub> H <sub>12</sub> O            | 0.29 |
| 25.72 | Phenol, 2-methyl-6-(2-propenyl)-               | C <sub>10</sub> H <sub>12</sub> O            | 0.76 |
| 26.42 | Benzocycloheptatriene                          | C <sub>11</sub> H <sub>10</sub>              | 0.82 |
| 27.08 | Bicyclo[4.4.1]undeca-1,3,5,7,9-pentaene        | C <sub>11</sub> H <sub>10</sub>              | 0.61 |
| 29.84 | Naphthalene, 1-(1-methylethyl)-                | C <sub>13</sub> H <sub>14</sub>              | 0.37 |
| 31.71 | Naphthalene, 1,8-dimethyl-                     | C <sub>12</sub> H <sub>12</sub>              | 0.54 |
| 37.48 | Naphthalene, 1,6,7-trimethyl-                  | C <sub>13</sub> H <sub>14</sub>              | 0.26 |
| 38.22 | Fluorene                                       | C <sub>13</sub> H <sub>10</sub>              | 0.27 |
| 42.00 | Naphthalene, 1,2,3,4-tetramethyl-              | C <sub>14</sub> H <sub>16</sub>              | 0.24 |
| 42.46 | 9H-Fluoren-9-one                               | C <sub>13</sub> H <sub>8</sub> O             | 0.16 |
| 42.62 | n-Pentadecanol                                 | C <sub>15</sub> H <sub>22</sub> O            | 1.10 |
| 42.88 | Tetradecane                                    | C <sub>14</sub> H <sub>30</sub>              | 0.45 |

**Table S4**

## Main identified products from catalytic co-pyrolysis of cellulose and PP with Cat-C

| RT<br>(min) | Peak Name                                       | Chem.<br>Formula                              | Relative Area<br>(%) |
|-------------|-------------------------------------------------|-----------------------------------------------|----------------------|
| 2.14        | 2-Butene, 2-methyl-                             | C <sub>5</sub> H <sub>10</sub>                | 9.14                 |
| 2.46        | 2-Pentene, 3-methyl-                            | C <sub>6</sub> H <sub>12</sub>                | 11.54                |
| 2.75        | 2,4-Hexadiene                                   | C <sub>6</sub> H <sub>10</sub>                | 4.94                 |
| 2.87        | Benzene                                         | C <sub>6</sub> H <sub>6</sub>                 | 4.00                 |
| 3.12        | Cyclopentane, 1,3-dimethyl-, cis-               | C <sub>7</sub> H <sub>14</sub>                | 0.63                 |
| 3.26        | 3-Furanmethanol                                 | C <sub>5</sub> H <sub>6</sub> O <sub>2</sub>  | 4.05                 |
| 3.86        | 3-Cyclohexene-1-acetaldehyde, $\pi$ 4-dimethyl- | C <sub>10</sub> H <sub>16</sub> O             | 1.21                 |
| 4.11        | 3-Octene, (Z)-                                  | C <sub>8</sub> H <sub>16</sub>                | 3.26                 |
| 4.34        | Toluene                                         | C <sub>7</sub> H <sub>8</sub>                 | 4.64                 |
| 4.87        | 4-Octene, (E)-                                  | C <sub>8</sub> H <sub>16</sub>                | 0.66                 |
| 5.03        | 4-Octene, (E)-                                  | C <sub>8</sub> H <sub>16</sub>                | 1.19                 |
| 5.11        | 4-Octene, (E)-                                  | C <sub>8</sub> H <sub>16</sub>                | 0.92                 |
| 5.34        | 2,2-Dimethyl-3-heptene trans                    | C <sub>9</sub> H <sub>18</sub>                | 1.03                 |
| 6.00        | 2,2-Dimethyl-3-heptene trans                    | C <sub>9</sub> H <sub>18</sub>                | 7.27                 |
| 6.29        | 2,4-Dimethyl-1-heptene                          | C <sub>9</sub> H <sub>18</sub>                | 1.75                 |
| 6.38        | 4-Nonene                                        | C <sub>9</sub> H <sub>18</sub>                | 1.80                 |
| 6.59        | Isooctanol                                      | C <sub>8</sub> H <sub>18</sub> O              | 1.26                 |
| 6.95        | Ethylbenzene                                    | C <sub>8</sub> H <sub>10</sub>                | 0.70                 |
| 7.09        | Cyclohexanone, 3,5-dimethyl-                    | C <sub>8</sub> H <sub>14</sub> O              | 0.58                 |
| 7.27        | Benzene, 1,3-dimethyl-                          | C <sub>8</sub> H <sub>10</sub>                | 2.95                 |
| 7.66        | Cyclohexane, (2-methylpropyl)-                  | C <sub>10</sub> H <sub>20</sub>               | 2.04                 |
| 7.88        | 2-Propenoic acid, 2-methylpropyl ester          | C <sub>7</sub> H <sub>12</sub> O <sub>2</sub> | 0.48                 |
| 8.09        | o-Xylene                                        | C <sub>8</sub> H <sub>10</sub>                | 1.52                 |
| 8.26        | Cyclohexane, propyl-                            | C <sub>9</sub> H <sub>18</sub>                | 0.42                 |
| 8.37        | Phenol, 3-ethyl-                                | C <sub>8</sub> H <sub>10</sub> O <sub>2</sub> | 0.24                 |
| 8.48        | Furan, 2,5-dimethyl-                            | C <sub>6</sub> H <sub>8</sub> O               | 0.25                 |
| 9.38        | 3-Penten-2-one, 4-methyl-                       | C <sub>6</sub> H <sub>10</sub> O              | 0.61                 |
| 9.93        | 1-Dodecene                                      | C <sub>12</sub> H <sub>24</sub>               | 0.75                 |
| 10.29       | 4-Isopropylcyclohexanone                        | C <sub>9</sub> H <sub>16</sub> O              | 0.25                 |
| 10.48       | 1-Dodecanol                                     | C <sub>12</sub> H <sub>26</sub> O             | 0.39                 |
| 10.74       | 1-Decanol                                       | C <sub>10</sub> H <sub>22</sub> O             | 0.54                 |
| 10.95       | Benzene, 1-ethyl-3-methyl-                      | C <sub>9</sub> H <sub>12</sub>                | 2.07                 |
| 11.33       | Benzene, 1,3,5-trimethyl-                       | C <sub>9</sub> H <sub>12</sub>                | 0.66                 |
| 11.86       | Phenol                                          | C <sub>6</sub> H <sub>6</sub> O               | 0.35                 |
| 12.06       | 3-Undecene, (Z)-                                | C <sub>11</sub> H <sub>22</sub>               | 0.33                 |
| 12.44       | Benzene, 1-ethyl-3-methyl-                      | C <sub>9</sub> H <sub>12</sub>                | 2.21                 |
| 13.67       | Benzene, 1,2,4-trimethyl-                       | C <sub>9</sub> H <sub>12</sub>                | 0.73                 |
| 14.28       | Indane                                          | C <sub>9</sub> H <sub>10</sub>                | 0.67                 |
| 14.71       | Indane                                          | C <sub>9</sub> H <sub>10</sub>                | 0.44                 |



|       |                                                              |                                                |      |
|-------|--------------------------------------------------------------|------------------------------------------------|------|
| 15.27 | 2(3H)-Furanone,4,5-dihydro-4-(2-methyl-3-methylenebut-4-yl)- | C <sub>10</sub> H <sub>16</sub> O <sub>2</sub> | 0.41 |
| 16.29 | Benzene, 1-ethyl-2,4-dimethyl-                               | C <sub>10</sub> H <sub>14</sub>                | 0.22 |
| 16.42 | Benzene, 1-methyl-4-(1-methylethyl)-                         | C <sub>10</sub> H <sub>14</sub>                | 0.50 |
| 16.65 | 1-Tridecene                                                  | C <sub>13</sub> H <sub>26</sub>                | 0.42 |
| 16.71 | Benzene, 1-methyl-2-(1-methylethyl)-                         | C <sub>10</sub> H <sub>14</sub>                | 0.42 |
| 18.22 | Benzene, 1,2,4,5-tetramethyl-                                | C <sub>10</sub> H <sub>14</sub>                | 0.40 |
| 18.38 | Benzene, 1,2,4,5-tetramethyl-                                | C <sub>10</sub> H <sub>14</sub>                | 0.41 |
| 19.81 | Benzene, 1,2,4,5-tetramethyl-                                | C <sub>10</sub> H <sub>14</sub>                | 0.61 |
| 20.02 | 4,7-Methano-1H-inden-1-ol,3a,4,7,7a-tetrahydro-, acetate     | C <sub>12</sub> H <sub>14</sub> O <sub>2</sub> | 0.51 |
| 21.38 | Naphthalene                                                  | C <sub>10</sub> H <sub>8</sub>                 | 0.85 |
| 21.72 | Benzene, 1,3-bis(1-methylethyl)-                             | C <sub>12</sub> H <sub>18</sub>                | 0.22 |
| 25.73 | Pentadecane                                                  | C <sub>15</sub> H <sub>32</sub>                | 0.59 |
| 26.20 | 1-Pentadecene                                                | C <sub>15</sub> H <sub>30</sub>                | 0.19 |
| 26.43 | Naphthalene, 2-methyl-                                       | C <sub>11</sub> H <sub>10</sub>                | 0.58 |
| 26.58 | 1-Pentadecene                                                | C <sub>15</sub> H <sub>30</sub>                | 0.21 |
| 26.87 | 1-Tetradecene                                                | C <sub>14</sub> H <sub>28</sub>                | 0.35 |
| 27.09 | Naphthalene, 2-methyl-                                       | C <sub>11</sub> H <sub>10</sub>                | 0.27 |
| 29.85 | Azulene                                                      | C <sub>10</sub> H <sub>8</sub>                 | 0.23 |
| 31.72 | Naphthalene, 1-(1-methylethyl)-                              | C <sub>13</sub> H <sub>14</sub>                | 0.31 |
| 36.27 | Naphthalene, 1,6,7-trimethyl-                                | C <sub>13</sub> H <sub>14</sub>                | 0.19 |
| 37.00 | 1-Nonadecene                                                 | C <sub>19</sub> H <sub>38</sub>                | 0.21 |
| 38.23 | Fluorene                                                     | C <sub>13</sub> H <sub>10</sub>                | 0.22 |
| 38.92 | 1-Hexadecanol, 2-methyl-                                     | C <sub>17</sub> H <sub>36</sub> O              | 0.18 |
| 42.02 | 1-Nonadecene                                                 | C <sub>19</sub> H <sub>38</sub>                | 0.19 |

**Table S5**

Main identified products from catalytic co-pyrolysis of cellulose and PP with Cat-D

| RT (min) | Peak Name                      | Chem. Formula                                | Relative Area (%) |
|----------|--------------------------------|----------------------------------------------|-------------------|
| 1.99     | 2-Butene                       | C <sub>4</sub> H <sub>8</sub>                | 1.53              |
| 2.13     | 2-Pentene, (E)-                | C <sub>5</sub> H <sub>10</sub>               | 9.66              |
| 2.27     | Cyclopropane, 1,2,3-trimethyl- | C <sub>6</sub> H <sub>12</sub>               | 1.46              |
| 2.36     | 1-Pentene, 2-methyl-           | C <sub>6</sub> H <sub>12</sub>               | 2.65              |
| 2.44     | 2-Pentene, 3-methyl-           | C <sub>6</sub> H <sub>12</sub>               | 8.94              |
| 2.73     | 2-Pentene, 2,4-dimethyl-       | C <sub>7</sub> H <sub>14</sub>               | 5.86              |
| 2.85     | Benzene                        | C <sub>6</sub> H <sub>6</sub>                | 2.08              |
| 3.07     | 1-Butanol                      | C <sub>4</sub> H <sub>10</sub> O             | 0.88              |
| 3.24     | 3-Furanmethanol                | C <sub>5</sub> H <sub>6</sub> O <sub>2</sub> | 4.04              |
| 3.83     | Cyclohexane, ethyl-            | C <sub>8</sub> H <sub>16</sub>               | 1.10              |
| 4.08     | 3-Octene, (Z)-                 | C <sub>8</sub> H <sub>16</sub>               | 2.40              |
| 4.19     | 3-Octene, (Z)-                 | C <sub>8</sub> H <sub>16</sub>               | 0.76              |

|       |                                                 |                                               |      |
|-------|-------------------------------------------------|-----------------------------------------------|------|
| 4.32  | Toluene                                         | C <sub>7</sub> H <sub>8</sub>                 | 2.30 |
| 4.71  | 1,2-Cyclopentanedione, 3-methyl-                | C <sub>6</sub> H <sub>8</sub> O <sub>2</sub>  | 0.30 |
| 4.85  | 3-Octene, (E)-                                  | C <sub>8</sub> H <sub>16</sub>                | 0.97 |
| 5.03  | cis-4-Decenal                                   | C <sub>10</sub> H <sub>18</sub> O             | 2.45 |
| 5.32  | 2,2-Dimethyl-3-heptene trans                    | C <sub>9</sub> H <sub>18</sub>                | 0.81 |
| 5.97  | Cyclohexane, propyl-                            | C <sub>9</sub> H <sub>18</sub>                | 9.86 |
| 6.25  | 2,4-Dimethyl-1-heptene                          | C <sub>9</sub> H <sub>18</sub>                | 2.08 |
| 6.36  | trans--4-Nonene                                 | C <sub>9</sub> H <sub>18</sub>                | 2.07 |
| 6.58  | 1-Hexyn-3-ol, 3-methyl-                         | C <sub>7</sub> H <sub>12</sub> O              | 1.69 |
| 6.76  | Ethanone, 1-(1-cyclohexen-1-yl)-                | C <sub>8</sub> H <sub>12</sub> O              | 0.80 |
| 6.94  | Benzene, 1,3-dimethyl-                          | C <sub>8</sub> H <sub>10</sub>                | 1.06 |
| 7.10  | di-t-Butylacetylene                             | C <sub>10</sub> H <sub>18</sub>               | 0.90 |
| 7.18  | Cyclohexanone, 3,5-dimethyl-                    | C <sub>8</sub> H <sub>14</sub> O              | 1.21 |
| 7.30  | o-Xylene                                        | C <sub>8</sub> H <sub>10</sub>                | 0.98 |
| 7.64  | Cyclohexane, (2-methylpropyl)-                  | C <sub>10</sub> H <sub>20</sub>               | 2.53 |
| 7.87  | 1,4-Cyclohexadiene, 1-methyl-4-(1-methylethyl)- | C <sub>10</sub> H <sub>16</sub>               | 0.60 |
| 8.08  | o-Xylene                                        | C <sub>8</sub> H <sub>10</sub>                | 0.89 |
| 8.73  | 3-Decyn-2-ol                                    | C <sub>10</sub> H <sub>18</sub> O             | 0.23 |
| 9.02  | Flamenol                                        | C <sub>7</sub> H <sub>8</sub> O <sub>2</sub>  | 0.21 |
| 9.38  | Cyclopentanone, 2-methyl-                       | C <sub>6</sub> H <sub>10</sub> O              | 0.66 |
| 9.91  | 4-Isopropylcyclohexanone                        | C <sub>9</sub> H <sub>16</sub> O              | 0.67 |
| 10.30 | Phenol, 3,4-dimethyl-                           | C <sub>8</sub> H <sub>10</sub> O              | 0.26 |
| 10.47 | cis-3-Decene                                    | C <sub>10</sub> H <sub>20</sub>               | 0.46 |
| 10.73 | 4-Isopropylcyclohexanone                        | C <sub>9</sub> H <sub>16</sub> O              | 0.64 |
| 10.93 | 2-Furancarboxaldehyde, 5-methyl-                | C <sub>6</sub> H <sub>6</sub> O <sub>2</sub>  | 2.65 |
| 11.32 | Benzene, 1,3,5-trimethyl-                       | C <sub>9</sub> H <sub>12</sub>                | 0.39 |
| 11.86 | 2-Norbornyl acetate                             | C <sub>9</sub> H <sub>14</sub> O <sub>2</sub> | 0.53 |
| 12.05 | 5-Undecene, (Z)-                                | C <sub>11</sub> H <sub>22</sub>               | 0.38 |
| 12.43 | Benzene, 1-ethyl-3-methyl-                      | C <sub>9</sub> H <sub>12</sub>                | 1.25 |
| 12.68 | 2,4-Pentadien-1-ol, 3-pentyl-, (2Z)-            | C <sub>10</sub> H <sub>18</sub> O             | 0.27 |
| 12.74 | 2-Propenoic acid, 2-methyl-, ethyl ester        | C <sub>6</sub> H <sub>10</sub> O <sub>2</sub> | 0.26 |
| 13.11 | 2,3,4-Trimethyl-hex-3-enal                      | C <sub>9</sub> H <sub>16</sub> O              | 0.35 |
| 13.67 | Benzene, 1,4-diethyl-                           | C <sub>10</sub> H <sub>14</sub>               | 0.33 |
| 14.12 | D-Limonene                                      | C <sub>10</sub> H <sub>16</sub>               | 0.71 |
| 14.29 | 1-Undecene                                      | C <sub>11</sub> H <sub>22</sub>               | 0.43 |
| 14.71 | Indene                                          | C <sub>9</sub> H <sub>8</sub>                 | 0.30 |
| 14.95 | 1-Undecene                                      | C <sub>11</sub> H <sub>22</sub>               | 0.47 |
| 15.09 | 1-Undecene                                      | C <sub>11</sub> H <sub>22</sub>               | 0.41 |
| 15.26 | 1-Tridecene                                     | C <sub>13</sub> H <sub>26</sub>               | 0.52 |
| 15.36 | 1-Tetradecanol                                  | C <sub>14</sub> H <sub>30</sub> O             | 0.23 |
| 15.50 | 1-Dodecene                                      | C <sub>12</sub> H <sub>24</sub>               | 0.36 |
| 15.65 | 1-Tetradecanol                                  | C <sub>14</sub> H <sub>30</sub> O             | 0.56 |
| 16.41 | Benzene, 1-ethyl-2,4-dimethyl-                  | C <sub>10</sub> H <sub>14</sub>               | 0.62 |
| 16.63 | 1-Dodecanol                                     | C <sub>12</sub> H <sub>26</sub> O             | 0.51 |

|       |                     |                                   |      |
|-------|---------------------|-----------------------------------|------|
| 17.71 | 1-Tridecene         | C <sub>13</sub> H <sub>26</sub>   | 0.48 |
| 23.76 | Tetradecane         | C <sub>14</sub> H <sub>30</sub>   | 0.18 |
| 26.17 | 1-Pentadecene       | C <sub>15</sub> H <sub>30</sub>   | 0.32 |
| 34.96 | n-Pentadecanol      | C <sub>15</sub> H <sub>32</sub> O | 0.16 |
| 35.88 | n-Heptadecanol-1    | C <sub>17</sub> H <sub>36</sub> O | 0.25 |
| 38.58 | 1-Nonadecene        | C <sub>19</sub> H <sub>38</sub>   | 0.30 |
| 38.88 | 1-Decanol, 2-hexyl- | C <sub>16</sub> H <sub>34</sub> O | 0.50 |
| 46.14 | 1-Nonadecene        | C <sub>19</sub> H <sub>38</sub>   | 0.31 |

**Table S6**

All peaks for the catalytic co-pyrolysis of cellulose and PP with different (Ni)-MCM-41 catalysts

| M           |             | Cat-A       |             | Cat-B       |             | Cat-C       |             | Cat-D       |             |
|-------------|-------------|-------------|-------------|-------------|-------------|-------------|-------------|-------------|-------------|
| RT<br>(min) | Area<br>(%) |
| 2.17        | 10.41       | 1.99        | 1.70        | 2.13        | 12.67       | 2.14        | 9.14        | 1.99        | 1.53        |
| 2.50        | 6.04        | 2.13        | 11.62       | 2.45        | 9.39        | 2.46        | 11.54       | 2.13        | 9.66        |
| 2.78        | 2.14        | 2.45        | 11.17       | 2.73        | 3.00        | 2.75        | 4.94        | 2.27        | 1.46        |
| 2.86        | 0.53        | 2.73        | 5.54        | 2.86        | 4.37        | 2.87        | 4.00        | 2.36        | 2.65        |
| 3.13        | 0.53        | 2.87        | 4.25        | 3.08        | 0.55        | 3.12        | 0.63        | 2.44        | 8.94        |
| 3.28        | 5.57        | 3.08        | 1.34        | 3.25        | 3.90        | 3.26        | 4.05        | 2.73        | 5.86        |
| 3.90        | 0.79        | 3.25        | 3.87        | 3.84        | 1.14        | 3.86        | 1.21        | 2.85        | 2.08        |
| 4.13        | 0.89        | 3.85        | 0.97        | 4.04        | 0.96        | 4.11        | 3.26        | 3.07        | 0.88        |
| 4.38        | 2.86        | 4.09        | 2.12        | 4.07        | 0.74        | 4.34        | 4.64        | 3.24        | 4.04        |
| 4.79        | 0.24        | 4.20        | 0.46        | 4.32        | 5.21        | 4.72        | 0.29        | 3.83        | 1.10        |
| 5.06        | 3.15        | 4.35        | 4.86        | 4.70        | 0.20        | 4.87        | 0.66        | 4.08        | 2.40        |
| 5.38        | 1.56        | 4.58        | 0.22        | 4.84        | 0.68        | 5.03        | 1.19        | 4.19        | 0.76        |
| 5.87        | 0.33        | 4.72        | 0.26        | 4.99        | 2.06        | 5.11        | 0.92        | 4.32        | 2.30        |
| 6.06        | 12.53       | 4.87        | 0.63        | 5.31        | 0.62        | 5.34        | 1.03        | 4.71        | 0.30        |
| 6.33        | 1.02        | 5.06        | 2.89        | 5.43        | 0.26        | 5.81        | 0.33        | 4.85        | 0.97        |
| 6.43        | 0.89        | 5.33        | 0.59        | 5.95        | 7.34        | 6.00        | 7.27        | 5.03        | 2.45        |
| 6.65        | 1.17        | 5.47        | 0.22        | 6.24        | 0.70        | 6.29        | 1.75        | 5.32        | 0.81        |
| 6.83        | 0.32        | 6.02        | 7.89        | 6.34        | 1.09        | 6.38        | 1.80        | 5.46        | 0.26        |
| 6.99        | 0.53        | 6.26        | 1.11        | 6.56        | 0.49        | 6.59        | 1.26        | 5.81        | 0.34        |
| 7.14        | 0.41        | 6.37        | 1.39        | 6.73        | 0.18        | 6.78        | 0.41        | 5.97        | 9.86        |
| 7.36        | 3.44        | 6.60        | 1.05        | 6.92        | 0.65        | 6.95        | 0.70        | 6.25        | 2.08        |
| 7.71        | 3.05        | 6.77        | 0.46        | 7.07        | 0.43        | 7.09        | 0.58        | 6.36        | 2.07        |
| 7.94        | 0.95        | 6.96        | 1.10        | 7.24        | 4.26        | 7.27        | 2.95        | 6.58        | 1.69        |
| 8.15        | 1.20        | 7.09        | 0.75        | 7.62        | 1.55        | 7.66        | 2.04        | 6.76        | 0.80        |
| 8.32        | 0.40        | 7.30        | 3.46        | 7.86        | 0.38        | 7.88        | 0.48        | 6.94        | 1.06        |
| 8.43        | 0.18        | 7.66        | 1.31        | 8.06        | 1.93        | 8.09        | 1.52        | 7.10        | 0.90        |
| 8.71        | 0.55        | 7.88        | 0.36        | 8.23        | 0.26        | 8.26        | 0.42        | 7.18        | 1.21        |

|       |      |       |      |       |      |       |      |       |      |
|-------|------|-------|------|-------|------|-------|------|-------|------|
| 9.23  | 0.25 | 8.10  | 1.68 | 8.47  | 0.28 | 8.37  | 0.24 | 7.30  | 0.98 |
| 9.44  | 0.66 | 8.27  | 0.24 | 8.70  | 0.19 | 8.48  | 0.25 | 7.64  | 2.53 |
| 9.98  | 0.39 | 8.38  | 0.17 | 9.36  | 0.36 | 8.74  | 0.26 | 7.87  | 0.60 |
| 10.36 | 0.38 | 8.53  | 0.20 | 9.89  | 0.38 | 9.17  | 0.22 | 8.08  | 0.89 |
| 10.52 | 0.68 | 8.75  | 0.19 | 10.45 | 0.22 | 9.38  | 0.61 | 8.26  | 0.40 |
| 10.79 | 0.66 | 9.38  | 0.49 | 10.71 | 0.30 | 9.93  | 0.75 | 8.36  | 0.18 |
| 11.00 | 2.98 | 9.93  | 0.30 | 10.92 | 2.09 | 10.29 | 0.25 | 8.73  | 0.23 |
| 11.39 | 1.00 | 10.48 | 0.21 | 11.06 | 0.39 | 10.48 | 0.39 | 9.02  | 0.21 |
| 11.68 | 0.23 | 10.73 | 0.26 | 11.30 | 0.82 | 10.74 | 0.54 | 9.16  | 0.18 |
| 11.77 | 0.32 | 10.97 | 2.50 | 11.68 | 0.37 | 10.95 | 2.07 | 9.38  | 0.66 |
| 11.93 | 0.40 | 11.10 | 0.36 | 11.83 | 0.53 | 11.33 | 0.66 | 9.91  | 0.67 |
| 12.11 | 0.59 | 11.34 | 0.64 | 12.42 | 3.10 | 11.61 | 0.21 | 10.30 | 0.26 |
| 12.51 | 3.55 | 11.72 | 0.27 | 12.67 | 0.36 | 11.71 | 0.38 | 10.47 | 0.46 |
| 12.75 | 0.73 | 11.89 | 0.46 | 13.09 | 0.38 | 11.86 | 0.35 | 10.73 | 0.64 |
| 13.19 | 0.24 | 12.45 | 2.28 | 13.65 | 1.00 | 12.06 | 0.33 | 10.80 | 0.29 |
| 13.54 | 0.20 | 12.70 | 0.28 | 14.26 | 0.70 | 12.44 | 2.21 | 10.93 | 2.65 |
| 13.74 | 0.95 | 13.12 | 0.20 | 14.70 | 0.54 | 12.69 | 0.31 | 11.32 | 0.39 |
| 14.36 | 0.76 | 13.68 | 0.71 | 14.94 | 0.23 | 12.76 | 0.28 | 11.86 | 0.53 |
| 14.78 | 0.62 | 13.92 | 0.17 | 15.10 | 0.36 | 13.05 | 0.17 | 12.05 | 0.38 |
| 15.02 | 0.42 | 14.29 | 0.46 | 15.24 | 0.36 | 13.12 | 0.37 | 12.43 | 1.25 |
| 15.17 | 0.50 | 14.73 | 0.51 | 15.34 | 0.25 | 13.67 | 0.73 | 12.68 | 0.27 |
| 15.33 | 0.30 | 14.96 | 0.34 | 15.42 | 0.64 | 14.28 | 0.67 | 12.74 | 0.26 |
| 15.57 | 0.20 | 15.12 | 0.41 | 15.63 | 0.19 | 14.71 | 0.44 | 13.11 | 0.35 |
| 15.73 | 0.64 | 15.28 | 0.35 | 15.77 | 0.26 | 14.96 | 0.35 | 13.46 | 0.22 |
| 15.85 | 0.28 | 15.36 | 0.26 | 16.28 | 0.37 | 15.11 | 0.41 | 13.67 | 0.33 |
| 16.36 | 0.20 | 15.44 | 0.56 | 16.40 | 0.42 | 15.27 | 0.41 | 14.12 | 0.71 |
| 16.49 | 0.32 | 15.66 | 0.27 | 16.49 | 0.19 | 15.37 | 0.27 | 14.29 | 0.43 |
| 16.78 | 0.59 | 15.79 | 0.19 | 16.69 | 0.86 | 15.44 | 0.34 | 14.71 | 0.30 |
| 17.13 | 0.20 | 16.31 | 0.28 | 17.24 | 0.27 | 15.50 | 0.36 | 14.95 | 0.47 |
| 17.32 | 0.40 | 16.42 | 0.41 | 17.38 | 0.19 | 15.66 | 0.48 | 15.09 | 0.41 |
| 17.48 | 0.57 | 16.62 | 0.32 | 17.57 | 0.67 | 15.78 | 0.22 | 15.26 | 0.52 |
| 17.66 | 0.32 | 16.72 | 0.50 | 17.71 | 0.26 | 16.29 | 0.22 | 15.36 | 0.23 |
| 17.79 | 0.28 | 17.26 | 0.23 | 17.81 | 0.30 | 16.42 | 0.50 | 15.43 | 0.18 |
| 18.08 | 0.18 | 17.41 | 0.19 | 18.19 | 0.39 | 16.65 | 0.42 | 15.50 | 0.36 |
| 18.28 | 0.58 | 17.59 | 0.53 | 18.36 | 0.54 | 16.71 | 0.42 | 15.65 | 0.56 |
| 18.44 | 0.71 | 17.73 | 0.22 | 19.25 | 0.24 | 17.26 | 0.36 | 15.78 | 0.17 |
| 19.75 | 0.38 | 17.82 | 0.26 | 19.66 | 0.57 | 17.41 | 0.43 | 16.41 | 0.62 |
| 19.88 | 0.60 | 18.22 | 0.30 | 19.79 | 0.78 | 17.48 | 0.30 | 16.63 | 0.51 |
| 20.09 | 0.19 | 18.37 | 0.38 | 19.93 | 0.19 | 17.59 | 0.36 | 16.70 | 0.27 |
| 20.36 | 0.23 | 19.27 | 0.16 | 20.01 | 0.79 | 17.72 | 0.37 | 17.21 | 0.39 |
| 20.70 | 0.19 | 19.68 | 0.40 | 20.26 | 0.28 | 17.85 | 0.21 | 17.39 | 0.80 |
| 21.02 | 0.20 | 19.81 | 0.55 | 20.94 | 0.22 | 18.22 | 0.40 | 17.58 | 0.32 |
| 21.19 | 0.22 | 20.03 | 0.54 | 21.12 | 0.31 | 18.38 | 0.41 | 17.71 | 0.48 |
| 21.44 | 0.27 | 21.37 | 0.62 | 21.36 | 1.35 | 18.70 | 0.20 | 17.83 | 0.24 |

|       |      |       |      |       |      |       |      |       |      |
|-------|------|-------|------|-------|------|-------|------|-------|------|
| 22.05 | 0.21 | 21.55 | 0.33 | 21.55 | 0.38 | 19.27 | 0.18 | 18.00 | 0.23 |
| 22.54 | 0.19 | 21.72 | 0.25 | 21.71 | 0.27 | 19.68 | 0.33 | 18.25 | 0.26 |
| 22.91 | 0.17 | 21.95 | 0.30 | 21.95 | 0.37 | 19.81 | 0.61 | 19.76 | 0.22 |
| 23.65 | 0.26 | 24.82 | 0.18 | 22.02 | 0.20 | 20.02 | 0.51 | 19.81 | 0.17 |
| 23.84 | 0.23 | 25.11 | 0.20 | 24.81 | 0.31 | 21.38 | 0.85 | 20.01 | 0.18 |
| 24.89 | 0.30 | 25.22 | 0.18 | 25.10 | 0.25 | 21.56 | 0.29 | 20.11 | 0.17 |
| 25.17 | 0.19 | 25.51 | 0.18 | 24.81 | 0.29 | 21.72 | 0.22 | 20.94 | 0.18 |
| 25.58 | 0.58 | 25.73 | 0.59 | 25.72 | 0.76 | 21.97 | 0.47 | 21.94 | 0.34 |
| 25.80 | 0.99 | 26.43 | 0.52 | 26.42 | 0.82 | 23.78 | 0.26 | 23.09 | 0.18 |
| 26.25 | 0.39 | 27.08 | 0.35 | 26.86 | 0.17 | 25.52 | 0.36 | 23.18 | 0.21 |
| 26.49 | 0.53 | 29.83 | 0.23 | 27.08 | 0.61 | 25.73 | 0.59 | 23.76 | 0.18 |
| 26.64 | 0.33 | 31.72 | 0.37 | 29.84 | 0.37 | 26.20 | 0.19 | 25.50 | 0.34 |
| 26.93 | 0.50 | 34.23 | 0.18 | 31.71 | 0.54 | 26.43 | 0.58 | 25.73 | 0.26 |
| 27.16 | 0.20 | 35.88 | 0.25 | 31.88 | 0.17 | 26.58 | 0.21 | 26.17 | 0.32 |
| 27.67 | 0.23 | 36.26 | 0.18 | 31.88 | 0.22 | 26.87 | 0.35 | 26.56 | 0.18 |
| 28.40 | 0.25 | 36.79 | 0.19 | 34.79 | 0.24 | 27.09 | 0.27 | 26.85 | 0.26 |
| 29.92 | 0.28 | 37.52 | 0.35 | 34.97 | 0.29 | 27.61 | 0.17 | 27.23 | 0.19 |
| 30.66 | 0.18 | 38.04 | 0.20 | 35.89 | 0.19 | 28.32 | 0.21 | 27.59 | 0.19 |
| 31.79 | 0.38 | 38.21 | 0.32 | 37.48 | 0.26 | 29.85 | 0.23 | 30.83 | 0.18 |
| 31.96 | 0.17 | 38.60 | 0.17 | 37.81 | 0.16 | 31.72 | 0.31 | 31.18 | 0.19 |
| 32.28 | 0.22 | 38.90 | 0.26 | 38.22 | 0.27 | 34.59 | 0.26 | 34.22 | 0.23 |
| 32.62 | 0.17 | 38.98 | 0.21 | 42.00 | 0.24 | 35.90 | 0.31 | 34.96 | 0.16 |
| 34.06 | 0.21 | 42.01 | 0.23 | 42.46 | 0.16 | 36.27 | 0.19 | 35.88 | 0.25 |
| 34.29 | 0.22 | 42.66 | 0.52 | 42.53 | 0.20 | 37.00 | 0.21 | 38.58 | 0.30 |
| 34.64 | 0.31 | 42.83 | 0.18 | 42.62 | 1.10 | 37.56 | 0.29 | 38.88 | 0.50 |
| 35.34 | 0.18 | 43.05 | 0.27 | 42.88 | 0.45 | 38.23 | 0.22 | 42.60 | 0.60 |
| 35.96 | 0.46 | 48.20 | 0.36 | 43.05 | 0.46 | 38.92 | 0.18 | 42.81 | 0.22 |
| 36.08 | 0.21 |       |      | 43.46 | 0.19 | 42.02 | 0.19 | 42.87 | 0.20 |
| 36.33 | 0.42 |       |      | 45.34 | 0.18 | 42.65 | 0.46 | 44.38 | 0.17 |
| 36.88 | 0.36 |       |      | 46.15 | 0.18 | 42.83 | 0.18 | 44.87 | 0.19 |
| 37.07 | 0.43 |       |      | 48.21 | 0.93 | 43.85 | 0.23 | 45.33 | 0.23 |
| 37.45 | 0.24 |       |      | 51.31 | 0.26 | 43.95 | 0.20 | 46.14 | 0.31 |
| 37.62 | 0.49 |       |      |       |      | 45.16 | 0.18 |       |      |
| 38.12 | 0.24 |       |      |       |      | 45.36 | 0.22 |       |      |
| 38.30 | 0.32 |       |      |       |      | 48.21 | 0.36 |       |      |
| 38.97 | 0.19 |       |      |       |      |       |      |       |      |
| 39.06 | 0.19 |       |      |       |      |       |      |       |      |
| 39.28 | 0.17 |       |      |       |      |       |      |       |      |
| 40.96 | 0.18 |       |      |       |      |       |      |       |      |
| 42.08 | 0.25 |       |      |       |      |       |      |       |      |
| 42.72 | 0.49 |       |      |       |      |       |      |       |      |
| 42.90 | 0.29 |       |      |       |      |       |      |       |      |
| 43.92 | 0.18 |       |      |       |      |       |      |       |      |
| 44.01 | 0.17 |       |      |       |      |       |      |       |      |

|       |      |  |  |  |
|-------|------|--|--|--|
| 44.24 | 0.17 |  |  |  |
| 45.41 | 0.26 |  |  |  |
| 48.27 | 0.25 |  |  |  |

**Table S7**

Main identified products from catalytic pyrolysis of cellulose with catalyst M

| RT<br>(min) | Peak Name                                                  | Chem.<br>Formula                               | Relative<br>Area (%) |
|-------------|------------------------------------------------------------|------------------------------------------------|----------------------|
| 2.085       | 2H-Pyran-2-one, 5,6-dihydro-                               | C <sub>5</sub> H <sub>6</sub> O <sub>2</sub>   | 7.90                 |
| 2.418       | 3-Cyclopentene-1,2-diol, cis-                              | C <sub>5</sub> H <sub>8</sub> O <sub>2</sub>   | 12.55                |
| 2.748       | 2,6-Cyclooctadien-1-ol                                     | C <sub>8</sub> H <sub>12</sub> O               | 0.93                 |
| 2.884       | Benzene                                                    | C <sub>6</sub> H <sub>6</sub>                  | 0.89                 |
| 3.027       | Benzene                                                    | C <sub>6</sub> H <sub>6</sub>                  | 0.37                 |
| 3.285       | Furfural                                                   | C <sub>5</sub> H <sub>4</sub> O <sub>2</sub>   | 1.77                 |
| 3.544       | 2-Vinylfuran                                               | C <sub>6</sub> H <sub>6</sub> O                | 0.94                 |
| 3.996       | 1,6-Octadiene, 3,7-dimethyl-                               | C <sub>10</sub> H <sub>18</sub>                | 0.89                 |
| 4.367       | Cyclobutene, 2-propenylidene-                              | C <sub>7</sub> H <sub>8</sub>                  | 1.77                 |
| 5.04        | Maleic anhydride                                           | C <sub>4</sub> H <sub>2</sub> O <sub>3</sub>   | 11.73                |
| 5.472       | 3-Furaldehyde                                              | C <sub>5</sub> H <sub>4</sub> O <sub>2</sub>   | 1.01                 |
| 6.074       | Furfural                                                   | C <sub>5</sub> H <sub>4</sub> O <sub>2</sub>   | 23.08                |
| 6.186       | Furfural                                                   | C <sub>5</sub> H <sub>4</sub> O <sub>2</sub>   | 1.40                 |
| 6.748       | Phenol, 3-methyl-                                          | C <sub>7</sub> H <sub>8</sub> O                | 0.31                 |
| 7.088       | Furan, 2-propyl-                                           | C <sub>7</sub> H <sub>10</sub> O               | 1.32                 |
| 7.302       | o-Xylene                                                   | C <sub>8</sub> H <sub>10</sub>                 | 0.27                 |
| 7.646       | 4-Cyclopentene-1,3-dione                                   | C <sub>5</sub> H <sub>4</sub> O <sub>2</sub>   | 1.19                 |
| 8.084       | Styrene                                                    | C <sub>8</sub> H <sub>8</sub>                  | 0.63                 |
| 8.52        | Furan, 2,5-dimethyl-                                       | C <sub>6</sub> H <sub>8</sub> O                | 0.43                 |
| 8.724       | Hepten-2-yl 9-Tetradecen-1-ol, (E)-, 6-methyl-5-           | C <sub>14</sub> H <sub>28</sub> O              | 0.77                 |
| 9.37        | Cyclopentanone, 2-methyl-                                  | C <sub>6</sub> H <sub>10</sub> O               | 0.90                 |
| 10.955      | 2-Furancarboxaldehyde, 5-methyl-                           | C <sub>6</sub> H <sub>6</sub> O <sub>2</sub>   | 6.33                 |
| 11.877      | Phenol                                                     | C <sub>6</sub> H <sub>6</sub> O                | 1.48                 |
| 12.496      | Benzofuran                                                 | C <sub>8</sub> H <sub>6</sub> O                | 1.30                 |
| 12.7        | 2-Hydroxy-6-methyl-3-cyclohexen-1-carboxylic acid          | C <sub>8</sub> H <sub>12</sub> O <sub>3</sub>  | 0.34                 |
| 13.081      | 1,6-Cyclodecanediol                                        | C <sub>10</sub> H <sub>20</sub> O <sub>2</sub> | 0.08                 |
| 13.441      | 6-Hydroxymethyl-5-methyl-bicyclo[3.1.0]hexan-2-one         | C <sub>8</sub> H <sub>12</sub> O <sub>2</sub>  | 0.17                 |
| 13.669      | Benzene, 1,2,3-trimethyl-                                  | C <sub>9</sub> H <sub>12</sub>                 | 0.11                 |
| 13.849      | Decanal                                                    | C <sub>10</sub> H <sub>20</sub> O              | 0.47                 |
| 14.291      | Indane                                                     | C <sub>9</sub> H <sub>10</sub>                 | 0.36                 |
| 14.465      | 1,2-Benzenedicarboxaldehyde                                | C <sub>8</sub> H <sub>6</sub> O <sub>2</sub>   | 0.13                 |
| 14.73       | Indene                                                     | C <sub>9</sub> H <sub>8</sub>                  | 0.87                 |
| 14.853      | Bicyclo [2.2.1] heptane-2,3-dione, 1,7,7-trimethyl-, (1S)- | C <sub>10</sub> H <sub>14</sub> O <sub>2</sub> | 0.19                 |

|        |                                                         |                                                |      |
|--------|---------------------------------------------------------|------------------------------------------------|------|
| 14.948 | Hexane, 2,4-dimethyl-                                   | C <sub>8</sub> H <sub>18</sub>                 | 0.21 |
| 15.203 | Benzaldehyde, 3-hydroxy-                                | C <sub>7</sub> H <sub>6</sub> O <sub>2</sub>   | 0.09 |
| 15.281 | Phenol, 3-methyl-                                       | C <sub>7</sub> H <sub>8</sub> O                | 0.43 |
| 15.791 | Acetophenone                                            | C <sub>8</sub> H <sub>8</sub> O                | 0.25 |
| 16.363 | Phenol, 3-methyl-                                       | C <sub>7</sub> H <sub>8</sub> O                | 0.42 |
| 16.556 | Tetracyclo [4.4.1.1(7,10).0(2,5)] dodec-3-en-11-ol      | C <sub>12</sub> H <sub>16</sub> O              | 0.43 |
| 17.257 | 2H-Inden-2-one, 1,3-dihydro-                            | C <sub>9</sub> H <sub>8</sub> O                | 0.26 |
| 17.601 | Benzofuran, 7-methyl-                                   | C <sub>9</sub> H <sub>8</sub> O                | 0.37 |
| 17.801 | Benzofuran, 2-methyl-                                   | C <sub>9</sub> H <sub>8</sub> O                | 0.71 |
| 18.016 | Benzene, ethoxy-                                        | C <sub>8</sub> H <sub>10</sub> O               | 0.12 |
| 18.985 | 9-Oxabicyclo [6.1.0] nonan-4-ol                         | C <sub>8</sub> H <sub>14</sub> O <sub>2</sub>  | 0.17 |
| 19.254 | 5,7-Dodecadiyn-1,12-diol                                | C <sub>12</sub> H <sub>18</sub> O <sub>2</sub> | 0.10 |
| 19.668 | 1H-Indene, 3-methyl-                                    | C <sub>10</sub> H <sub>10</sub>                | 0.19 |
| 19.771 | 1H-Indene, 3-methyl-                                    | C <sub>10</sub> H <sub>10</sub>                | 0.27 |
| 20.032 | Tetracyclo [5.3.0.0<2,6>.0<3,10>] deca-4,8-diene        | C <sub>10</sub> H <sub>10</sub>                | 0.34 |
| 21.121 | Furan, 2-(2-furanylmethyl)-5-methyl-                    | C <sub>10</sub> H <sub>10</sub> O <sub>2</sub> | 0.21 |
| 21.491 | Nonanal                                                 | C <sub>9</sub> H <sub>18</sub> O               | 1.30 |
| 24.913 | Panaxydol                                               | C <sub>17</sub> H <sub>24</sub> O <sub>2</sub> | 0.12 |
| 25.137 | o-[(1,2,3,4-tetrahydro-2-naphthyl) methyl]-             | C <sub>20</sub> H <sub>22</sub> O <sub>2</sub> | 0.14 |
| 25.192 | Naphthalene, 1,2-dihydro-3-methyl-                      | C <sub>11</sub> H <sub>12</sub>                | 0.09 |
| 25.478 | 2-Naphthalenol                                          | C <sub>10</sub> H <sub>8</sub> O               | 0.18 |
| 25.637 | 1H-Inden-1-one, 2,3-dihydro-                            | C <sub>9</sub> H <sub>8</sub> O                | 0.37 |
| 26.41  | Bicyclo [4.4.1] undeca-1,3,5,7,9-pentaene               | C <sub>11</sub> H <sub>10</sub>                | 0.36 |
| 26.852 | Tridecane                                               | C <sub>12</sub> H <sub>28</sub>                | 0.18 |
| 27.052 | Bicyclo [4.4.1] undeca-1,3,5,7,9-pentaene               | C <sub>11</sub> H <sub>10</sub>                | 0.58 |
| 27.369 | 3-(1-Cyclopentenyl) furan                               | C <sub>9</sub> H <sub>10</sub> O               | 0.40 |
| 29.093 | Naphthalene, 1,2,3,4-tetrahydro-1,4,6-trimethyl-        | C <sub>13</sub> H <sub>18</sub>                | 0.26 |
| 30.549 | 4H-1-Benzopyran-4-one                                   | C <sub>9</sub> H <sub>6</sub> O <sub>2</sub>   | 0.38 |
| 32.174 | 2-Furancarboxaldehyde, 5-(2-furanylmethyl)-             | C <sub>10</sub> H <sub>8</sub> O <sub>3</sub>  | 0.48 |
| 33.97  | 2H-1,5-Benzodioxepin, 3,4-dihydro-3-methylene-          | C <sub>10</sub> H <sub>10</sub> O <sub>2</sub> | 0.75 |
| 34.957 | n-Tridecan-1-ol                                         | C <sub>13</sub> H <sub>28</sub> O              | 0.24 |
| 35.848 | 2-Furancarboxaldehyde, 5-[(5-methyl-2-furanyl) methyl]- | C <sub>11</sub> H <sub>10</sub> O <sub>3</sub> | 0.49 |
| 38.177 | Fluorene                                                | C <sub>13</sub> H <sub>10</sub>                | 0.23 |
| 38.946 | Fluorene                                                | C <sub>13</sub> H <sub>10</sub>                | 0.13 |
| 39.946 | Benzophenone                                            | C <sub>13</sub> H <sub>10</sub> O              | 0.16 |
| 42.572 | 1-Hexadecanol, 2-methyl-                                | C <sub>17</sub> H <sub>36</sub> O              | 0.23 |

**Table S8**

Main identified products from catalytic pyrolysis of PP with catalyst M

| RT (min) | Peak Name       | Chem. Formula                  | Relative Area (%) |
|----------|-----------------|--------------------------------|-------------------|
| 2.112    | 2-Pentene, (E)- | C <sub>5</sub> H <sub>10</sub> | 4.77              |

|        |                                   |                                 |       |
|--------|-----------------------------------|---------------------------------|-------|
| 2.187  | 2-Butene, 2-methyl-               | C <sub>5</sub> H <sub>10</sub>  | 7.28  |
| 2.503  | 2-Pentene, 3-methyl-              | C <sub>6</sub> H <sub>12</sub>  | 12.39 |
| 2.792  | 1-Butene, 2-ethyl-3-methyl-       | C <sub>7</sub> H <sub>14</sub>  | 3.58  |
| 2.874  | 3-Hexene, 2-methyl-, (Z)-         | C <sub>7</sub> H <sub>14</sub>  | 3.44  |
| 3.132  | (Z)-2-Heptene                     | C <sub>7</sub> H <sub>14</sub>  | 2.49  |
| 3.275  | 3-Hexene, 3-methyl-, (Z)-         | C <sub>7</sub> H <sub>14</sub>  | 8.49  |
| 3.891  | 1-Dodecene                        | C <sub>8</sub> H <sub>16</sub>  | 0.95  |
| 4.081  | 3-Octene, (Z)-                    | C <sub>8</sub> H <sub>16</sub>  | 3.38  |
| 4.21   | 2-Hexene, 3,5-dimethyl-           | C <sub>8</sub> H <sub>16</sub>  | 2.43  |
| 4.445  | 1-Dodecene                        | C <sub>8</sub> H <sub>16</sub>  | 1.55  |
| 4.877  | 4-Octene, (E)-                    | C <sub>8</sub> H <sub>16</sub>  | 2.95  |
| 5.122  | 3-Octene, (E)-                    | C <sub>8</sub> H <sub>16</sub>  | 3.84  |
| 5.333  | 2-Hexene, 3,5-dimethyl-           | C <sub>8</sub> H <sub>16</sub>  | 1.32  |
| 5.479  | 1-Dodecene                        | C <sub>8</sub> H <sub>16</sub>  | 0.38  |
| 6.023  | 2,3-Dimethyl-3-heptene            | C <sub>9</sub> H <sub>18</sub>  | 1.75  |
| 6.404  | 2,3-Dimethyl-3-heptene            | C <sub>9</sub> H <sub>18</sub>  | 1.72  |
| 6.601  | trans--4-Nonene                   | C <sub>9</sub> H <sub>18</sub>  | 2.18  |
| 6.802  | 4-Nonene                          | C <sub>9</sub> H <sub>18</sub>  | 0.77  |
| 6.897  | trans--4-Nonene                   | C <sub>9</sub> H <sub>18</sub>  | 0.77  |
| 7.217  | 3-Nonene, (E)-                    | C <sub>9</sub> H <sub>18</sub>  | 1.82  |
| 7.336  | 4-Nonene                          | C <sub>9</sub> H <sub>18</sub>  | 1.16  |
| 7.622  | 4-Nonene                          | C <sub>9</sub> H <sub>18</sub>  | 1.53  |
| 7.928  | trans--4-Nonene                   | C <sub>9</sub> H <sub>18</sub>  | 1.48  |
| 8.112  | Ethylbenzene                      | C <sub>8</sub> H <sub>10</sub>  | 0.57  |
| 8.268  | 3-Heptene, 4-ethyl-               | C <sub>9</sub> H <sub>18</sub>  | 1.14  |
| 8.401  | trans-2-Methyl-3-octene           | C <sub>9</sub> H <sub>18</sub>  | 0.87  |
| 8.68   | trans--4-Nonene                   | C <sub>9</sub> H <sub>18</sub>  | 0.60  |
| 8.965  | 3-Octene, 4-ethyl-                | C <sub>10</sub> H <sub>20</sub> | 0.32  |
| 9.047  | 3-Octene, 2,2-dimethyl-           | C <sub>10</sub> H <sub>20</sub> | 0.25  |
| 9.196  | 3-Octene, 2,2-dimethyl-           | C <sub>10</sub> H <sub>20</sub> | 0.25  |
| 9.424  | 3-Octene, 2,2-dimethyl-           | C <sub>10</sub> H <sub>20</sub> | 0.22  |
| 9.503  | 3-Octene, 2,2-dimethyl-           | C <sub>10</sub> H <sub>20</sub> | 0.14  |
| 9.928  | 2-Decene, (Z)-                    | C <sub>10</sub> H <sub>20</sub> | 0.91  |
| 10.332 | 3-Heptene, 4-propyl-              | C <sub>10</sub> H <sub>20</sub> | 0.30  |
| 10.479 | 4-Octene, 2,6-dimethyl-, [S-(E)]- | C <sub>10</sub> H <sub>20</sub> | 0.80  |
| 10.768 | cis-3-Decene                      | C <sub>10</sub> H <sub>20</sub> | 0.84  |
| 10.856 | cis-4-Decene                      | C <sub>10</sub> H <sub>20</sub> | 0.28  |
| 10.982 | 3-Octene, 2,2-dimethyl-           | C <sub>10</sub> H <sub>20</sub> | 0.29  |
| 11.071 | trans-3-Decene                    | C <sub>10</sub> H <sub>20</sub> | 0.90  |
| 11.377 | cis-3-Decene                      | C <sub>10</sub> H <sub>20</sub> | 0.69  |
| 11.638 | 2-Decene, (Z)-                    | C <sub>10</sub> H <sub>20</sub> | 0.66  |
| 12.091 | 4-Octene, 2,6-dimethyl-, [S-(E)]- | C <sub>10</sub> H <sub>20</sub> | 0.84  |
| 12.468 | Mesitylene                        | C <sub>9</sub> H <sub>12</sub>  | 1.11  |
| 12.713 | 2-Nonene, 2-methyl-               | C <sub>10</sub> H <sub>20</sub> | 0.69  |



|        |                                       |                                 |      |
|--------|---------------------------------------|---------------------------------|------|
| 13.135 | 4-Undecene, (Z)-                      | C <sub>11</sub> H <sub>22</sub> | 0.39 |
| 13.509 | 3-Undecene, (Z)-                      | C <sub>11</sub> H <sub>22</sub> | 0.32 |
| 13.696 | 1-Decene, 5-methyl-                   | C <sub>11</sub> H <sub>22</sub> | 0.43 |
| 13.982 | 3-Undecene, (Z)-                      | C <sub>11</sub> H <sub>22</sub> | 0.24 |
| 14.332 | 3-Undecene, (Z)-                      | C <sub>11</sub> H <sub>22</sub> | 0.42 |
| 14.723 | 3-Undecene, (Z)-                      | C <sub>11</sub> H <sub>22</sub> | 0.26 |
| 14.934 | 3-Undecene, (Z)-                      | C <sub>11</sub> H <sub>22</sub> | 0.60 |
| 15.142 | 3-Undecene, (Z)-                      | C <sub>11</sub> H <sub>22</sub> | 0.63 |
| 15.301 | 3-Undecene, (Z)-                      | C <sub>11</sub> H <sub>22</sub> | 0.26 |
| 15.407 | 3-Undecene, (Z)-                      | C <sub>11</sub> H <sub>22</sub> | 0.32 |
| 15.638 | 3-Undecene, (Z)-                      | C <sub>11</sub> H <sub>22</sub> | 0.53 |
| 15.815 | 3-Undecene, (Z)-                      | C <sub>11</sub> H <sub>22</sub> | 0.25 |
| 15.944 | 3-Undecene, (Z)-                      | C <sub>11</sub> H <sub>22</sub> | 0.41 |
| 16.505 | 3-Undecene, (Z)-                      | C <sub>11</sub> H <sub>22</sub> | 0.27 |
| 16.74  | 3-Undecene, (Z)-                      | C <sub>11</sub> H <sub>22</sub> | 0.37 |
| 17.244 | 3-Undecene, (Z)-                      | C <sub>11</sub> H <sub>22</sub> | 0.31 |
| 17.454 | 3-Undecene, (Z)-                      | C <sub>11</sub> H <sub>22</sub> | 0.49 |
| 17.743 | 1-Dodecene                            | C <sub>12</sub> H <sub>24</sub> | 0.36 |
| 18.243 | 1-Dodecene                            | C <sub>12</sub> H <sub>24</sub> | 0.28 |
| 18.407 | 1-Dodecene                            | C <sub>12</sub> H <sub>24</sub> | 0.23 |
| 19.845 | 1-Dodecene                            | C <sub>12</sub> H <sub>24</sub> | 0.44 |
| 20.036 | 1-Dodecene                            | C <sub>12</sub> H <sub>24</sub> | 0.24 |
| 20.209 | 1-Dodecene                            | C <sub>12</sub> H <sub>24</sub> | 0.17 |
| 20.43  | 1-Dodecene                            | C <sub>12</sub> H <sub>24</sub> | 0.18 |
| 21.957 | 3-Tridecene, (E)-                     | C <sub>13</sub> H <sub>26</sub> | 0.29 |
| 22.134 | Cyclohexane, 2-butyl-1,1,3-trimethyl- | C <sub>13</sub> H <sub>26</sub> | 0.16 |
| 25.542 | 7-Tetradecene, (E)-                   | C <sub>14</sub> H <sub>28</sub> | 0.17 |
| 25.753 | 7-Tetradecene, (E)-                   | C <sub>14</sub> H <sub>28</sub> | 0.28 |
| 26.209 | 7-Tetradecene, (E)-                   | C <sub>14</sub> H <sub>28</sub> | 0.19 |
| 26.457 | 7-Tetradecene, (E)-                   | C <sub>14</sub> H <sub>28</sub> | 0.20 |
| 27.253 | 7-Tetradecene, (E)-                   | C <sub>14</sub> H <sub>28</sub> | 0.17 |
| 39.235 | 1-Octadecene                          | C <sub>18</sub> H <sub>36</sub> | 0.11 |

**Table S9**

Main identified products from catalytic pyrolysis of cellulose with Cat-C

| RT<br>(min) | Peak Name           | Chem.<br>Formula                 | Relative Area<br>(%) |
|-------------|---------------------|----------------------------------|----------------------|
| 2.194       | 3-Penten-1-ol, (Z)- | C <sub>5</sub> H <sub>10</sub> O | 6.45                 |
| 2.483       | Furan, 3-methyl-    | C <sub>5</sub> H <sub>6</sub> O  | 10.63                |
| 2.537       | Furan, 3-methyl-    | C <sub>5</sub> H <sub>6</sub> O  | 6.47                 |
| 2.786       | 1,4-Hexadiene       | C <sub>6</sub> H <sub>10</sub>   | 2.93                 |
| 2.928       | Benzene             | C <sub>6</sub> H <sub>6</sub>    | 5.02                 |

|        |                                                |                                              |       |
|--------|------------------------------------------------|----------------------------------------------|-------|
| 3.102  | 2-Hexene                                       | C <sub>6</sub> H <sub>12</sub>               | 1.99  |
| 3.343  | Furan, 2,5-dimethyl-                           | C <sub>6</sub> H <sub>8</sub> O              | 5.13  |
| 3.595  | 2-Vinylfuran                                   | C <sub>6</sub> H <sub>6</sub> O              | 1.90  |
| 4.415  | Cyclobutene, 2-propenylidene-                  | C <sub>7</sub> H <sub>8</sub>                | 2.80  |
| 5.112  | cis-4-Decenal                                  | C <sub>10</sub> H <sub>18</sub> O            | 2.53  |
| 5.537  | Furfural                                       | C <sub>5</sub> H <sub>4</sub> O <sub>2</sub> | 0.55  |
| 6.173  | Furfural                                       | C <sub>5</sub> H <sub>4</sub> O <sub>2</sub> | 17.98 |
| 6.275  | Furfural                                       | C <sub>5</sub> H <sub>4</sub> O <sub>2</sub> | 3.45  |
| 6.816  | Furan, 2-(2-propenyl)-                         | C <sub>7</sub> H <sub>8</sub> O              | 0.42  |
| 7.357  | p-Xylene                                       | C <sub>8</sub> H <sub>10</sub>               | 0.66  |
| 7.741  | Phenol                                         | C <sub>6</sub> H <sub>6</sub> O              | 0.42  |
| 8.153  | Styrene                                        | C <sub>8</sub> H <sub>8</sub>                | 1.07  |
| 8.598  | Furan, 2,5-dimethyl-                           | C <sub>6</sub> H <sub>8</sub> O              | 2.06  |
| 8.809  | 2,4-Hexadiene, 2,5-dimethyl-                   | C <sub>8</sub> H <sub>14</sub>               | 0.83  |
| 9.935  | 2-Cyclopenten-1-one, 3,4-dimethyl-             | C <sub>7</sub> H <sub>10</sub> O             | 0.34  |
| 11.033 | 2-Furancarboxaldehyde, 5-methyl-               | C <sub>6</sub> H <sub>6</sub> O <sub>2</sub> | 5.08  |
| 11.292 | 2-Furancarboxaldehyde, 5-methyl-               | C <sub>6</sub> H <sub>6</sub> O <sub>2</sub> | 0.41  |
| 12.023 | Phenol                                         | C <sub>6</sub> H <sub>6</sub> O              | 2.26  |
| 12.56  | Benzofuran                                     | C <sub>8</sub> H <sub>6</sub> O              | 2.25  |
| 14.377 | Benzene, cyclopropyl-                          | C <sub>9</sub> H <sub>10</sub>               | 0.62  |
| 14.785 | Indene                                         | C <sub>9</sub> H <sub>8</sub>                | 0.62  |
| 15.438 | Phenol, 3-methyl-                              | C <sub>7</sub> H <sub>8</sub> O              | 1.41  |
| 15.87  | Acetophenone                                   | C <sub>8</sub> H <sub>8</sub> O              | 0.33  |
| 16.604 | Phenol, 3-methyl-                              | C <sub>7</sub> H <sub>8</sub> O              | 1.22  |
| 16.74  | Phenol, 3-methyl-                              | C <sub>7</sub> H <sub>8</sub> O              | 0.40  |
| 17.611 | 2H-Inden-2-one, 1,3-dihydro-                   | C <sub>9</sub> H <sub>8</sub> O              | 0.56  |
| 17.863 | Benzofuran, 2-methyl-                          | C <sub>9</sub> H <sub>8</sub> O              | 1.27  |
| 19.832 | Phenol, 2-methyl-6-(2-propenyl)-               | C <sub>10</sub> H <sub>12</sub> O            | 0.35  |
| 20.09  | Tetracyclo[5.3.0.0<2,6>.0<3,10>]deca-4,8-diene | C <sub>10</sub> H <sub>10</sub>              | 0.92  |
| 21.43  | Naphthalene                                    | C <sub>10</sub> H <sub>8</sub>               | 0.83  |
| 21.567 | Naphthalene                                    | C <sub>10</sub> H <sub>8</sub>               | 0.35  |
| 22.934 | Cinnamaldehyde, β-methyl-                      | C <sub>10</sub> H <sub>10</sub> O            | 0.34  |
| 25.07  | Tetradecane                                    | C <sub>14</sub> H <sub>30</sub>              | 0.39  |
| 25.168 | Tetradecane                                    | C <sub>14</sub> H <sub>30</sub>              | 1.30  |
| 25.753 | 2H-Inden-2-one, 1,3-dihydro-                   | C <sub>9</sub> H <sub>8</sub> O              | 1.79  |
| 26.529 | Naphthalene, 1-methyl-                         | C <sub>11</sub> H <sub>10</sub>              | 0.86  |
| 26.937 | Tetradecane                                    | C <sub>14</sub> H <sub>30</sub>              | 0.43  |
| 27.189 | Naphthalene, 2-methyl-                         | C <sub>11</sub> H <sub>10</sub>              | 0.66  |
| 30.879 | 1-Tetradecene                                  | C <sub>14</sub> H <sub>28</sub>              | 0.54  |
| 31.233 | Tetradecane, 2,6,10-trimethyl-                 | C <sub>17</sub> H <sub>36</sub>              | 0.41  |
| 31.831 | Pentadecane, 2-methyl-                         | C <sub>16</sub> H <sub>34</sub>              | 0.33  |

---

**Table S10**

Main identified products from catalytic pyrolysis of PP with Cat-C

| RT<br>(min) | Peak Name                      | Chem.<br>Formula                | Relative Area<br>(%) |
|-------------|--------------------------------|---------------------------------|----------------------|
| 2.34        | Cyclopropane, 1,2,3-trimethyl- | C <sub>6</sub> H <sub>12</sub>  | 4.74                 |
| 2.541       | 2-Pentene, 3-methyl-, (Z)-     | C <sub>6</sub> H <sub>12</sub>  | 8.07                 |
| 2.803       | 2-Pentene, 4,4-dimethyl-, (Z)- | C <sub>7</sub> H <sub>14</sub>  | 3.68                 |
| 2.894       | Benzene                        | C <sub>6</sub> H <sub>6</sub>   | 6.01                 |
| 3.146       | Cyclopentane, 1,3-dimethyl-    | C <sub>7</sub> H <sub>14</sub>  | 1.58                 |
| 3.296       | 3-Hexene, 3-methyl-, (Z)-      | C <sub>7</sub> H <sub>14</sub>  | 5.12                 |
| 3.905       | 3-Hexene, 3-methyl-, (Z)-      | C <sub>7</sub> H <sub>14</sub>  | 1.01                 |
| 4.095       | 3-Octene, (Z)-                 | C <sub>8</sub> H <sub>16</sub>  | 3.13                 |
| 4.387       | 1,3,5-Cycloheptatriene         | C <sub>7</sub> H <sub>8</sub>   | 5.73                 |
| 4.768       | 3-Octene, (E)-                 | C <sub>8</sub> H <sub>16</sub>  | 0.59                 |
| 4.921       | 4-Octene, (E)-                 | C <sub>8</sub> H <sub>16</sub>  | 0.91                 |
| 5.146       | 3-Octene, (Z)-                 | C <sub>8</sub> H <sub>16</sub>  | 1.89                 |
| 5.36        | 1-Octene                       | C <sub>8</sub> H <sub>16</sub>  | 1.17                 |
| 6.034       | 2,3-Dimethyl-3-heptene         | C <sub>9</sub> H <sub>18</sub>  | 1.90                 |
| 6.415       | 2,2-Dimethyl-3-heptene trans   | C <sub>9</sub> H <sub>18</sub>  | 1.82                 |
| 6.608       | trans--4-Nonene                | C <sub>9</sub> H <sub>18</sub>  | 1.50                 |
| 6.795       | trans--4-Nonene                | C <sub>9</sub> H <sub>18</sub>  | 0.56                 |
| 6.966       | Ethylbenzene                   | C <sub>8</sub> H <sub>10</sub>  | 1.21                 |
| 7.125       | 1-Dodecene                     | C <sub>12</sub> H <sub>24</sub> | 0.79                 |
| 7.323       | Benzene, 1,3-dimethyl-         | C <sub>8</sub> H <sub>10</sub>  | 2.91                 |
| 7.68        | 2,2-Dimethyl-3-heptene trans   | C <sub>10</sub> H <sub>20</sub> | 1.02                 |
| 7.904       | 1-Dodecene                     | C <sub>12</sub> H <sub>24</sub> | 0.51                 |
| 8.125       | o-Xylene                       | C <sub>8</sub> H <sub>10</sub>  | 1.49                 |
| 8.272       | 2,3-Dimethyl-3-heptene         | C <sub>9</sub> H <sub>18</sub>  | 0.50                 |
| 8.391       | 3-Heptene, 2,6-dimethyl-       | C <sub>9</sub> H <sub>18</sub>  | 0.38                 |
| 9.391       | 3-Octene, 2,2-dimethyl-        | C <sub>10</sub> H <sub>20</sub> | 0.52                 |
| 9.928       | 2-Decene, (Z)-                 | C <sub>10</sub> H <sub>20</sub> | 0.63                 |
| 10.479      | 2-Decene, (Z)-                 | C <sub>10</sub> H <sub>20</sub> | 0.50                 |
| 10.751      | cis-3-Decene                   | C <sub>10</sub> H <sub>20</sub> | 0.99                 |
| 10.965      | Benzene, 1-ethyl-3-methyl-     | C <sub>9</sub> H <sub>12</sub>  | 1.55                 |
| 11.339      | Benzene, 1-ethyl-3-methyl-     | C <sub>9</sub> H <sub>12</sub>  | 0.85                 |
| 11.71       | Benzene, 1-ethyl-3-methyl-     | C <sub>9</sub> H <sub>12</sub>  | 0.55                 |
| 12.462      | Benzene, 1-ethyl-3-methyl-     | C <sub>9</sub> H <sub>12</sub>  | 1.93                 |
| 12.679      | Cyclopentane, 1,2-dipropyl-    | C <sub>11</sub> H <sub>22</sub> | 0.43                 |
| 12.744      | 1-Tridecene                    | C <sub>13</sub> H <sub>26</sub> | 0.41                 |
| 13.105      | 1-Tridecene                    | C <sub>13</sub> H <sub>26</sub> | 0.58                 |
| 13.676      | Mesitylene                     | C <sub>9</sub> H <sub>12</sub>  | 0.89                 |
| 14.285      | 1-Tridecene                    | C <sub>13</sub> H <sub>26</sub> | 0.42                 |
| 15.108      | 1-Tridecene                    | C <sub>13</sub> H <sub>26</sub> | 0.53                 |

|        |                                         |                                 |      |
|--------|-----------------------------------------|---------------------------------|------|
| 15.428 | Benzene, 1-methyl-4-(1-methylethyl)-    | C <sub>10</sub> H <sub>14</sub> | 1.09 |
| 15.638 | 1-Tridecene                             | C <sub>13</sub> H <sub>26</sub> | 0.56 |
| 16.703 | p-Cymene                                | C <sub>10</sub> H <sub>14</sub> | 0.91 |
| 17.407 | 1-Tridecene                             | C <sub>13</sub> H <sub>26</sub> | 0.46 |
| 17.567 | 1-Tridecene                             | C <sub>13</sub> H <sub>26</sub> | 0.55 |
| 18.216 | Benzene, 1-methyl-4-(1-methylethyl)-    | C <sub>10</sub> H <sub>14</sub> | 0.49 |
| 18.373 | p-Cymene                                | C <sub>10</sub> H <sub>14</sub> | 0.52 |
| 19.801 | Benzene, 1-methyl-4-(1-methylethyl)-    | C <sub>10</sub> H <sub>14</sub> | 0.58 |
| 20.002 | 1-Tridecene                             | C <sub>13</sub> H <sub>26</sub> | 0.61 |
| 20.07  | 1-Tridecene                             | C <sub>13</sub> H <sub>26</sub> | 0.42 |
| 20.267 | Benzene, 1-methyl-4-(1-methylethyl)-    | C <sub>10</sub> H <sub>14</sub> | 0.41 |
| 21.39  | Naphthalene                             | C <sub>10</sub> H <sub>8</sub>  | 2.66 |
| 22.029 | 1-Tridecene                             | C <sub>13</sub> H <sub>26</sub> | 0.84 |
| 25.216 | Naphthalene, 1,2-dihydro-3-methyl-      | C <sub>11</sub> H <sub>12</sub> | 1.00 |
| 25.75  | 1-Tridecene                             | C <sub>13</sub> H <sub>26</sub> | 1.25 |
| 26.512 | Benzocycloheptatriene                   | C <sub>11</sub> H <sub>10</sub> | 2.46 |
| 27.158 | Bicyclo[4.4.1]undeca-1,3,5,7,9-pentaene | C <sub>11</sub> H <sub>10</sub> | 1.05 |
| 28.308 | 2-Piperidinone, N-[4-bromo-n-butyl]-    | C <sub>13</sub> H <sub>26</sub> | 0.42 |
| 30.1   | tert-Hexadecanethiol                    | C <sub>13</sub> H <sub>26</sub> | 0.49 |
| 31.807 | Naphthalene, 1-(1-methylethyl)-         | C <sub>13</sub> H <sub>14</sub> | 0.76 |
| 36.596 | Heptadecane                             | C <sub>17</sub> H <sub>36</sub> | 0.20 |

**Table S11**

All peaks for the catalytic pyrolysis of cellulose or PP with catalyst M and Cat-C

| Cellulose with M |          | PP with M |          | Cellulose with Cat-C |          | PP with Cat-C |          |
|------------------|----------|-----------|----------|----------------------|----------|---------------|----------|
| RT (min)         | Area (%) | RT (min)  | Area (%) | RT (min)             | Area (%) | RT (min)      | Area (%) |
| 2.418            | 12.55    | 2.187     | 7.28     | 2.483                | 10.63    | 2.541         | 8.07     |
| 2.748            | 0.93     | 2.503     | 12.39    | 2.537                | 6.47     | 2.803         | 3.68     |
| 2.884            | 0.89     | 2.792     | 3.58     | 2.786                | 2.93     | 2.894         | 6.01     |
| 3.027            | 0.37     | 2.874     | 3.44     | 2.928                | 5.02     | 3.146         | 1.58     |
| 3.285            | 1.77     | 3.132     | 2.49     | 3.102                | 1.99     | 3.296         | 5.12     |
| 3.544            | 0.94     | 3.275     | 8.49     | 3.343                | 5.13     | 3.905         | 1.01     |
| 3.908            | 0.06     | 3.741     | 0.13     | 3.595                | 1.90     | 4.095         | 3.13     |
| 3.996            | 0.89     | 3.891     | 0.95     | 4.415                | 2.80     | 4.387         | 5.73     |
| 4.367            | 1.77     | 4.081     | 3.38     | 4.928                | 0.44     | 4.768         | 0.59     |
| 4.863            | 0.10     | 4.21      | 2.43     | 5.112                | 2.53     | 4.921         | 0.91     |
| 5.04             | 11.73    | 4.445     | 1.55     | 5.537                | 0.55     | 5.146         | 1.89     |
| 5.472            | 1.01     | 4.877     | 2.95     | 6.173                | 17.98    | 5.36          | 1.17     |
| 6.074            | 23.08    | 5.122     | 3.84     | 6.275                | 3.45     | 5.683         | 0.14     |
| 6.186            | 1.40     | 5.333     | 1.32     | 6.816                | 0.42     | 5.836         | 0.20     |
| 6.748            | 0.31     | 5.479     | 0.38     | 7.357                | 0.66     | 6.034         | 1.90     |
| 6.962            | 0.11     | 5.833     | 0.16     | 7.741                | 0.42     | 6.415         | 1.82     |

|        |      |        |      |        |      |        |      |
|--------|------|--------|------|--------|------|--------|------|
| 7.088  | 1.32 | 6.023  | 1.75 | 8.153  | 1.07 | 6.608  | 1.50 |
| 7.302  | 0.27 | 6.404  | 1.72 | 8.598  | 2.06 | 6.795  | 0.56 |
| 7.646  | 1.19 | 6.601  | 2.18 | 8.809  | 0.83 | 6.966  | 1.21 |
| 8.084  | 0.63 | 6.802  | 0.77 | 9.935  | 0.34 | 7.125  | 0.79 |
| 8.52   | 0.43 | 6.897  | 0.77 | 11.033 | 5.08 | 7.323  | 2.91 |
| 8.724  | 0.77 | 7.217  | 1.82 | 11.292 | 0.41 | 7.68   | 1.02 |
| 9.37   | 0.90 | 7.336  | 1.16 | 12.023 | 2.26 | 7.904  | 0.51 |
| 9.598  | 0.09 | 7.622  | 1.53 | 12.56  | 2.25 | 8.125  | 1.49 |
| 9.829  | 0.28 | 7.928  | 1.48 | 14.377 | 0.62 | 8.272  | 0.50 |
| 10.547 | 0.16 | 8.112  | 0.57 | 14.785 | 0.62 | 8.391  | 0.38 |
| 10.717 | 0.10 | 8.268  | 1.14 | 15.438 | 1.41 | 8.666  | 0.14 |
| 10.955 | 6.33 | 8.401  | 0.87 | 15.87  | 0.33 | 8.748  | 0.12 |
| 11.217 | 0.23 | 8.68   | 0.60 | 16.604 | 1.22 | 9.03   | 0.29 |
| 11.479 | 0.06 | 8.965  | 0.32 | 16.74  | 0.40 | 9.176  | 0.22 |
| 11.717 | 0.06 | 9.047  | 0.25 | 17.611 | 0.56 | 9.391  | 0.52 |
| 11.877 | 1.48 | 9.196  | 0.25 | 17.863 | 1.27 | 9.928  | 0.63 |
| 12.496 | 1.30 | 9.424  | 0.22 | 19.832 | 0.35 | 10.299 | 0.24 |
| 12.7   | 0.34 | 9.503  | 0.14 | 20.09  | 0.92 | 10.479 | 0.50 |
| 13.081 | 0.08 | 9.928  | 0.91 | 21.43  | 0.83 | 10.751 | 0.99 |
| 13.441 | 0.17 | 10.332 | 0.30 | 21.567 | 0.35 | 10.965 | 1.55 |
| 13.669 | 0.11 | 10.479 | 0.80 | 22.934 | 0.34 | 11.224 | 0.00 |
| 13.849 | 0.47 | 10.768 | 0.84 | 25.07  | 0.39 | 11.339 | 0.85 |
| 14.131 | 0.08 | 10.856 | 0.28 | 25.168 | 1.30 | 11.611 | 0.30 |
| 14.291 | 0.36 | 10.982 | 0.29 | 25.753 | 1.79 | 11.71  | 0.55 |
| 14.465 | 0.13 | 11.071 | 0.90 | 26.529 | 0.86 | 12.05  | 0.37 |
| 14.73  | 0.87 | 11.377 | 0.69 | 26.937 | 0.43 | 12.462 | 1.93 |
| 14.853 | 0.19 | 11.638 | 0.66 | 27.189 | 0.66 | 12.679 | 0.43 |
| 14.948 | 0.21 | 11.737 | 0.19 | 30.879 | 0.54 | 12.744 | 0.41 |
| 15.203 | 0.09 | 11.962 | 0.12 | 31.233 | 0.41 | 13.105 | 0.58 |
| 15.281 | 0.43 | 12.091 | 0.84 | 31.831 | 0.33 | 13.455 | 0.34 |
| 15.791 | 0.25 | 12.468 | 1.11 |        |      | 13.676 | 0.89 |
| 16.363 | 0.42 | 12.713 | 0.69 |        |      | 13.914 | 0.24 |
| 16.556 | 0.43 | 13.053 | 0.17 |        |      | 14.285 | 0.42 |
| 16.693 | 0.12 | 13.135 | 0.39 |        |      | 14.71  | 0.34 |
| 17.257 | 0.26 | 13.37  | 0.12 |        |      | 14.948 | 0.36 |
| 17.601 | 0.37 | 13.509 | 0.32 |        |      | 15.108 | 0.53 |
| 17.801 | 0.71 | 13.696 | 0.43 |        |      | 15.251 | 0.25 |
| 18.016 | 0.12 | 13.982 | 0.24 |        |      | 15.428 | 1.09 |
| 18.985 | 0.17 | 14.332 | 0.42 |        |      | 15.638 | 0.56 |
| 19.254 | 0.10 | 14.461 | 0.16 |        |      | 15.768 | 0.24 |
| 19.668 | 0.19 | 14.642 | 0.13 |        |      | 15.893 | 0.12 |
| 19.771 | 0.27 | 14.723 | 0.26 |        |      | 15.948 | 0.11 |
| 19.924 | 0.06 | 14.934 | 0.60 |        |      | 16.288 | 0.27 |
| 20.032 | 0.34 | 15.142 | 0.63 |        |      | 16.407 | 0.45 |

|        |      |        |      |        |      |
|--------|------|--------|------|--------|------|
| 20.25  | 0.08 | 15.301 | 0.26 | 16.703 | 0.91 |
| 21.121 | 0.21 | 15.407 | 0.32 | 16.842 | 0.18 |
| 21.366 | 0.12 | 15.472 | 0.19 | 17.281 | 0.21 |
| 21.491 | 1.30 | 15.54  | 0.19 | 17.407 | 0.46 |
| 21.923 | 0.18 | 15.638 | 0.53 | 17.567 | 0.55 |
| 22.328 | 0.08 | 15.815 | 0.25 | 17.699 | 0.38 |
| 22.457 | 0.13 | 15.944 | 0.41 | 17.822 | 0.25 |
| 22.723 | 0.09 | 16.247 | 0.15 | 18.111 | 0.14 |
| 22.869 | 0.15 | 16.505 | 0.27 | 18.216 | 0.49 |
| 23.019 | 0.06 | 16.74  | 0.37 | 18.373 | 0.52 |
| 23.11  | 0.09 | 16.89  | 0.13 | 18.506 | 0.17 |
| 23.267 | 0.18 | 17.107 | 0.17 | 19.278 | 0.12 |
| 23.515 | 0.11 | 17.244 | 0.31 | 19.437 | 0.19 |
| 24.161 | 0.08 | 17.454 | 0.49 | 19.573 | 0.16 |
| 24.42  | 0.08 | 17.618 | 0.18 | 19.682 | 0.36 |
| 24.913 | 0.12 | 17.743 | 0.36 | 19.801 | 0.58 |
| 25.137 | 0.14 | 17.873 | 0.18 | 20.002 | 0.61 |
| 25.192 | 0.09 | 18.243 | 0.28 | 20.07  | 0.42 |
| 25.478 | 0.18 | 18.407 | 0.23 | 20.267 | 0.41 |
| 25.637 | 0.37 | 18.665 | 0.15 | 20.478 | 0.14 |
| 26.41  | 0.36 | 19.036 | 0.12 | 20.611 | 0.23 |
| 26.852 | 0.18 | 19.206 | 0.16 | 20.941 | 0.16 |
| 27.052 | 0.58 | 19.359 | 0.18 | 21.39  | 2.66 |
| 27.369 | 0.40 | 19.539 | 0.12 | 21.686 | 0.37 |
| 27.579 | 0.09 | 19.652 | 0.19 | 22.029 | 0.84 |
| 28.005 | 0.19 | 19.845 | 0.44 | 23.291 | 0.33 |
| 29.093 | 0.26 | 20.036 | 0.24 | 23.736 | 0.15 |
| 30.549 | 0.38 | 20.148 | 0.16 | 23.808 | 0.17 |
| 30.936 | 0.21 | 20.209 | 0.17 | 24.733 | 0.26 |
| 31.164 | 0.19 | 20.332 | 0.13 | 24.866 | 0.35 |
| 31.351 | 0.10 | 20.43  | 0.18 | 25.216 | 1.00 |
| 31.691 | 0.25 | 20.648 | 0.15 | 25.495 | 0.16 |
| 32.174 | 0.48 | 20.995 | 0.13 | 25.75  | 1.25 |
| 33.97  | 0.75 | 21.658 | 0.13 | 26.195 | 0.29 |
| 34.957 | 0.24 | 21.957 | 0.29 | 26.512 | 2.46 |
| 35.263 | 0.15 | 22.134 | 0.16 | 26.852 | 0.26 |
| 35.433 | 0.06 | 23.335 | 0.12 | 27.158 | 1.05 |
| 35.616 | 0.23 | 23.801 | 0.14 | 27.464 | 0.24 |
| 35.848 | 0.49 | 24.185 | 0.11 | 27.627 | 0.18 |
| 37.467 | 0.13 | 24.855 | 0.14 | 27.791 | 0.27 |
| 38.177 | 0.23 | 25.369 | 0.15 | 28.308 | 0.42 |
| 38.854 | 0.24 | 25.542 | 0.17 | 29.042 | 0.12 |
| 38.946 | 0.13 | 25.753 | 0.28 | 29.654 | 0.15 |
| 39.946 | 0.16 | 25.94  | 0.15 | 29.882 | 0.36 |

|        |      |        |      |        |      |
|--------|------|--------|------|--------|------|
| 40.157 | 0.08 | 26.209 | 0.19 | 30.1   | 0.49 |
| 42.572 | 0.23 | 26.457 | 0.20 | 30.77  | 0.22 |
| 42.844 | 0.31 | 26.889 | 0.11 | 30.845 | 0.18 |
| 46.112 | 0.34 | 27.253 | 0.17 | 31.236 | 0.25 |
|        |      | 39.235 | 0.11 | 31.671 | 0.11 |
|        |      |        |      | 31.807 | 0.76 |
|        |      |        |      | 32.045 | 0.15 |
|        |      |        |      | 32.59  | 0.34 |
|        |      |        |      | 33.226 | 0.26 |
|        |      |        |      | 33.76  | 0.19 |
|        |      |        |      | 34.77  | 0.33 |
|        |      |        |      | 35.293 | 0.20 |
|        |      |        |      | 36.596 | 0.20 |

---
